# 1 **Embracing scale-dependence to achieve a deeper understanding of** 2 **biodiversity and its change across communities**

3

4 *Authors and affiliations:*

5 Jonathan M. Chase\*; German Centre for Integrative Biodiversity Research (iDiv), Halle-Jena-

6 Leipzig and Department of Computer Science, Martin Luther University, Halle-Wittenberg;

7 [jonathan.chase@idiv.de](mailto:jonathan.chase@idiv.de)

8

9 Brian J. McGill\*; School of Biology and Ecology & Mitchell Center for Sustainability Solutions,

10 University of Maine; [mail@brianmcgill.org](mailto:mail@brianmcgill.org)

11

12 Daniel J. McGlinn; Biology Department, College of Charleston, Charleston, SC;

13 [mcglinndj@cofc.edu](mailto:mcglinndj@cofc.edu)

14

15 Felix May; German Centre for Integrative Biodiversity Research (iDiv), Halle-Jena-Leipzig;

16 [felix.may@idiv.de](mailto:felix.may@idiv.de)

17

18 Shane A. Blowes; German Centre for Integrative Biodiversity Research (iDiv), Halle-Jena-

19 Leipzig; [shane.blowes@idiv.de](mailto:shane.blowes@idiv.de)

20

21 Xiao Xiao; School of Biology and Ecology, University of Maine; [xiao@weecology.org](mailto:xiao@weecology.org)

22

1 Tiffany M. Knight; Dept. Community Ecology, Helmholtz Centre for Environmental Research –  
2 UFZ; Institute of Biology, Martin Luther University Halle-Wittenberg; German Centre for  
3 Integrative Biodiversity Research (iDiv), Halle-Jena-Leipzig. [tiffany.knight@idiv.de](mailto:tiffany.knight@idiv.de)

4  
5 Oliver Purschke; German Centre for Integrative Biodiversity Research (iDiv), Halle-Jena-  
6 Leipzig; [oliver.purschke@idiv.de](mailto:oliver.purschke@idiv.de)

7  
8 Nicholas J. Gotelli; University of Vermont, Department of Biology; [Nicholas.Gotelli@uvm.edu](mailto:Nicholas.Gotelli@uvm.edu)

9  
10 \*Joint first authors

11  
12 Statement of Authorship: JC and BM conceived the study and the overall approach, and all  
13 authors participated in multiple working group meetings to develop and refine the approach. JC  
14 collected the data for the meta-analysis that led to Figure 2 and S1; BM collected the data for the  
15 meta-analysis that led to Fig. 6,7; SB and FM did the meta-analyses; FM did the simulations for  
16 Fig. 5; DM, FM and XX wrote the code for the analysis used for the recipe and case study in  
17 Figure 8. JC, BM and NG wrote first drafts of most sections, and all authors contributed  
18 substantially to revisions.

19  
20 Data accessibility statement: All data for meta-analyses and case study will be deposited in a  
21 publically available repository with DOI upon acceptance (available in link for submission).

22  
23

1 *Running Title:* Scale-dependence in biodiversity comparisons

2

3 *Key Words:* Species-area relationship; species richness; evenness; Hill number; Simpson's index;

4 rarefaction; scale-dependence

5

6 *Type of Article:* Reviews and Syntheses

7

8 *Number of references:* 74

9 *Number of words in abstract:* 195

10 *Number of words in main text:* 7497

11 *Number of Tables:* 1

12 *Number of Figures:* 8

13

14

15

16

17 *Mailing address of corresponding author:*

18 Jonathan Chase

19 German Centre for Integrative Biodiversity Research (iDiv) Halle-Jena-Leipzig

20 Deutscher Platz 5e

21 04103 Leipzig

22 Germany

23

1 **Abstract:**

2 Although spatial scale plays a critical role in estimates of biodiversity, most empirical studies  
3 ignore scale or use only simple controls for sampling intensity. In a meta-analysis of studies that  
4 measured biodiversity responses to numerous ecological drivers across scales, we found nearly  
5 universal scale-dependence: effect sizes either greatly increased or decreased across scales, and  
6 nearly 10% switched directions across scales. Next, we show how accumulation and rarefaction  
7 curves can be used to dissect the effects of biodiversity scaling based on three components: total  
8 number of individuals (N), the shape of the species abundance distribution (SADs), and the  
9 pattern of spatial aggregation. In a second meta-analysis of studies with multiple rarefaction  
10 curves, ~30% of them crossed, and the three components of biodiversity were uncorrelated,  
11 contradicting conventional wisdom that most biodiversity measures are strongly intercorrelated.  
12 These results imply that there is no single ‘magic metric’ or scale for measuring biodiversity, and  
13 that multiple measures and scales are necessary to quantify biodiversity patterns. We use a case  
14 study of nutrient additions in experimental ponds to illustrate how this multi-scale perspective  
15 reveals the responses of biodiversity to ecological drivers, and allows for a more informed search  
16 for possible mechanisms.

17

## 1 **Introduction**

2 Biodiversity is fundamentally a scale-dependent metric, making comparisons complex and  
3 challenging. This challenge has been recognized for decades, and ecologists have searched for  
4 solutions to this problem (e.g., Preston 1960, MacArthur and MacArthur 1961, Hurlbert 1971,  
5 Hill 1973, Lande 1996, Gotelli and Colwell 2001, Jost 2006, Chao and Jost 2012, Chase and  
6 Knight 2013). Nevertheless, most empirical studies measure a single variable, species richness,  
7 at a single spatial scale. And theoretical ecologists have continued the search for a single  
8 ‘magic’ metric of biodiversity and its comparison.

9  
10 Rather than aiming towards a single metric or appropriate scale for comparisons of biodiversity,  
11 we argue that it is better to embrace scale as a modifier when comparing biodiversity measures  
12 (e.g., across treatments). Many studies demonstrate that the magnitude, and even direction, of  
13 biodiversity change in response to natural and anthropogenic factors depends on spatial scale  
14 (e.g., Chase and Leibold 2002, Dumbrell et al. 2008, Keil et al. 2011, Powell et al. 2013a). The  
15 focus on species richness at a single spatial scale limits our ability to understand and synthesize  
16 how biodiversity changes in response to natural and anthropogenic factors. However, it is  
17 unclear how general scale-dependence is, and how exactly to account for it in empirical analyses.

18  
19 The scale-dependence of biodiversity change is not just a theoretical issue, but is a concrete  
20 problem affecting biodiversity conservation and management. For example, Hill and Hamer  
21 (2004) showed that tropical forest bird diversity tended to decrease following logging when the  
22 scale of studies was relatively small (i.e., less than 25 ha), whereas studies at scales greater than  
23 25 ha tended to show an increase in bird diversity in logged forests. Here, understanding the

1 scale-dependence of the result of the disturbance-diversity relationship illuminates the likely  
2 mechanisms. Diversity declined at small scales because forest specialists were negatively  
3 influenced by logging, whereas diversity increased at larger scales because species with habitat  
4 preferences for forest edge or open areas benefitted from logging.

5  
6 In the first part of this paper, we present a meta-analysis of scale-dependent changes in species  
7 richness between treatments of ecological drivers. Next, we discuss methods and tools that  
8 capture key aspects of scale dependence to achieve an intermediate “Goldilocks approach” – not  
9 more complicated than necessary, but complex enough to adequately describe biodiversity  
10 change. We focus on three components underlying species richness: the numbers of individuals  
11 ( $N$ ), the shape of the species abundance distribution (SAD) and the aggregation of species in  
12 space, and we highlight metrics that can capture aspects of these components. In another meta-  
13 analysis comparing empirical rarefaction curves (i.e., studies with information about SADs), we  
14 show that these components are not strongly correlated, indicating that biodiversity change can  
15 emerge from changes on any of these components, and that rarefaction curves can often cross,  
16 qualitatively switching the direction of biodiversity change across scales. Finally, we provide a  
17 recipe and case study showing how our approach can illuminate much about the patterns, and  
18 potential underlying processes, of biodiversity change.

## 19 20 **Empirical evidence that scale-dependence is the rule, not the exception**

21 Sample grain (i.e., the size of the sampling unit) and sample extent (i.e., the collective area  
22 encompassed by all sampling units) each influence observed values of biodiversity and the  
23 measure of biodiversity change between different communities (e.g., Palmer and White 1994,

1 Scheiner et al. 2000, Sandel and Smith 2009). Sample grain size is often chosen on the basis of  
2 sampling efficiency, time constraints, environmental impact concerns, and/or tradition. For  
3 example, sample grain for herbaceous plants is often  $1\text{m}^2$ , whereas sample grain in plankton  
4 surveys is determined by the net size and tow length. Although most biodiversity studies are not  
5 explicitly designed to address scale dependence, it can still be detected by quantifying the effect  
6 of sampling effort (number of individuals or samples collected) on estimates of biodiversity.

7  
8 We use two examples to illustrate scale-dependence of biodiversity responses to ecological  
9 drivers (Figure 1). First, Powell et al. (2013a) examined the effect of a dominant plant invader  
10 on native plant biodiversity in replicate invaded and uninvaded communities (Fig 1a) and found  
11 that plant species richness decreased with the presence of the invader in  $1\text{m}^2$  plots (t-test:  $t=3.9$ ;  
12  $df=4$ ;  $P=0.018$ ) but was not significantly different in a  $500\text{m}^2$  area (the total extent of the  
13 community considered:  $t=2.5$ ;  $df=4$ ;  $P=0.08$ ). Importantly, the effect size resulting from these  
14 two grains is quite different (log-response ratio of 1.39 for  $1\text{m}^2$  vs. 0.1 for  $500\text{m}^2$ ), calling into  
15 question the popular practice of combining studies on species richness across grains into a simple  
16 meta-analysis (e.g., Whittaker 2010, Chase and Knight 2013). In the second example, Lan et al.  
17 (2015a) examined the influence of sample grain on responses of plant species richness to  
18 nitrogen deposition in Mongolia (Fig. 1b). Although there was a significant negative  
19 relationship between the level of N addition and species richness at both smaller ( $1\text{m}^2$ ) and larger  
20 ( $25\text{m}^2$ ) grains, the slope of the relationship was much steeper at the larger grain size ( $y=19.54-$   
21  $0.30x$ ) relative to the smaller grain size ( $y=7.89-0.13x$ ), and one would conclude a much stronger  
22 effect of N deposition when considering larger relative to smaller grains. Conserving biodiversity  
23 is an important target for many land managers, and these examples illustrate that the applied

1 implications of these results (i.e., how concerned to be about threats of invaders and N  
2 deposition) depend on the scale of the study.  
3  
4 Are these scale-dependent results the rule or the exception? Although multiple-scale analyses  
5 are uncommon in the biodiversity literature, there are enough to allow for a quantitative meta-  
6 analysis. We performed a meta-analysis to discern the frequency, direction, and magnitude of  
7 changes in effect size of ecological drivers as a function of the spatial scale (sampling grain  
8 and/or extent) of a study. To do so, we identified possible studies using an ISI Web of Science  
9 search with the key words to identify studies that measured an index of diversity (“species  
10 richness or diversity or biodiversity”) AND an indication that scale was explicitly considered  
11 (“scale or grain or extent”) AND “ecology” (to eliminate hits that were in other fields). This  
12 yielded ~8,500 papers, from which we then read titles and if promising, abstracts, to determine  
13 whether studies measured diversity at multiple scales in response to an ecological driver. For  
14 relevant studies, we examined the results, figures, tables, and supplemental information to  
15 determine whether species richness at more than one scale in response to an ecological factor  
16 could be extracted. We found 103 comparisons within 52 studies (several studies reported  
17 responses from more than one driver, taxonomic group, or study site). A list of the studies and  
18 their data are given in the Supplemental material (Appendix 1).  
19  
20 Figure 2a shows the conceptual expectation for comparisons of the (log ratio) effect sizes of an  
21 ecological driver on species richness at small (x-axis) and the large (y-axis) scales. If scale-  
22 dependence were not important, most of the studies would fall near the 1:1 line, whereas the  
23 points would fall in the gray triangles if scale-dependence were important. If scale dependence  
24 influenced the qualitative direction of the effect (e.g., reversal from positive to negative), the



1 points would fall in the ‘flip flops with scale’ area of the figure. Figure 2b shows that scale  
2 dependence influences the magnitude of the effect of the factor on biodiversity in most  
3 comparisons in our meta-analysis, and the direction of the effect in eight comparisons.  
4  
5 In Figure 2b, there was only a weak relationship between effect sizes measured at large vs. small  
6 spatial scales ( $R^2=0.14$ ); thus observations at one scale poorly predict effect sizes at another  
7 scale. Moreover, there was a trend for studies to show larger effects at smaller, relative to larger  
8 spatial scales ( $\chi^2 = 3.1765$ ,  $df = 1$ ,  $p = 0.07$ ). We categorized the studies based on the ecological  
9 factor considered: disturbance, environmental change (e.g., climate factors, N-deposition),  
10 fragmentation/dispersal (e.g., fragmentation experiments, propagule addition experiments),  
11 grazing/predation, invasive species, and land use (e.g., intensity of urbanization, agriculture).  
12 Studies of invasive species, land use change, and grazers/predators found significantly higher  
13 effect sizes at small compared to larger spatial scales (see supplemental Figure S1). This implies  
14 that effect size estimates from studies on these factors at a single small spatial scale may  
15 overestimate their effects relative to that which would be observed at larger scales. Indeed, in a  
16 meta-analysis, Powell et al. (2011) found that the effect sizes of invasive species on plant  
17 richness systemically declined with increasing spatial scale. Because such small-scale estimates  
18 of biodiversity change are often used as inputs, for example, into ‘biodiversity scenario’ models  
19 that project future diversity loss (e.g., Alroy 2017, Newbold et al. 2017), we suspect that these  
20 will overestimate the actual change observed at more realistic larger scales.

21

## 1 **Biodiversity scaling theory indicates that scale-dependence is inevitable**

2 Species accumulation curves (SACs) are a general way to depict how species richness increases  
3 with increasing sampling effort (e.g., area, plots, numbers of individuals). SACs have an  
4 intercept at the origin (i.e., zero area or zero individuals have zero species), and rise non-linearly  
5 with increasing sample effort, often in a decelerating way (though they can also accelerate over  
6 some spatial grains, especially at larger scales). As a result, SACs between two or more  
7 communities cannot be parallel, unless they are identical (i.e. lie on top of each other). This  
8 inevitably leads to scale-dependence of most biodiversity measures. SACs of two communities  
9 will either converge, diverge, or crisscross with increased sampling effort if they differ in any of  
10 three underlying components that influence the shape of the SAC: the numbers of individuals  
11 (N), the size of the species pool and relative abundance of species (which we refer to collectively  
12 as the species abundance distribution (SAD)), and intraspecific aggregation (clumping) (e.g., He  
13 and Legendre 2002 McGlinn and Palmer 2009, McGill 2011a, Chase and Knight 2013).

14  
15 To illustrate how non-parallel SACs create scale-dependent biodiversity change, Figure 3 gives  
16 an example with three hypothetical communities (labelled A, B, C) each with a different SAC  
17 shape. The three vertical lines represent three scales (grains or extents), from which we can see  
18 that the grain size influences on the rankings of species density among the communities. Curves  
19 between two communities can diverge (e.g., A and C), consistent with the case study on nitrogen  
20 addition by Lan et al. (2015) described in Figure 1b and studies from the meta-analysis that  
21 showed larger effect sizes at larger spatial grains (Figure 2b). SACs between two communities  
22 can converge (e.g., B and C), consistent with the case study on invasive species by Powell et al.  
23 (2013a) described in Figure 1a and studies from the meta-analysis that showed smaller effect

1 sizes at larger spatial grains (Figure 2b). Finally, SACs can intersect and cross, so that  
2 biodiversity responses change sign with scale (e.g., A and B), consistent with the studies from  
3 the meta-analysis that showed shifts from positive to negative effect sizes with increasing spatial  
4 scale (Figure 2b). See James and Wamer (1982) for empirical examples of several SACs of bird  
5 diversity in different woodland habitat types that qualitatively resemble these hypothetical cases.  
6  
7 Three of the most commonly used and recommended approaches for dealing with the scaling  
8 problem in biodiversity studies include: (1) converting species richness into less ‘biased’  
9 measures that incorporate the relative abundances of species, such as Shannon’s or Simpson’s  
10 diversity indices (e.g., Hill 1973, Lande 1996, Jost 2006, 2007); (2) Comparing species richness  
11 values after controlling for sampling effort in the numbers of samples or individuals through  
12 rarefaction (e.g., Hurlbert 1971, Simberloff 1972, Gotelli and Colwell 2001, Cayuela et al.  
13 2015); or (3) Extrapolating species richness values to a hypothetical asymptote based on the  
14 estimation of the number of undetected species (e.g., Chao 1984, Colwell and Coddington 1994,  
15 Chao et al. 2009). Importantly, these have been combined into a single approach that combines  
16 interpolation and extrapolation (e.g., Chao and Jost 2012, Colwell et al. 2012), and explicitly  
17 incorporates measures of species relative abundances in the community (e.g., Chao et al. 2014a).  
18  
19 Despite these advances, the above methods typically aim towards a single, incomplete solution.  
20 For example, rarefactions that control for the numbers of individuals will still identify scale-  
21 dependent species richness rankings depending on the numbers of individuals to which species  
22 richness is rarefied (e.g., Gotelli and Colwell 2001, Cao et al. 2007, Chase and Knight 2013,  
23 Cayuela et al. 2015). On the other hand, if we were to use species richness extrapolations, we

1 are assuming that the only value of interest is the maximum number of species that is achieved at  
2 some hypothetical asymptote (e.g., scale 3 in Figure 3); focus only on the asymptote ignores  
3 important structural differences in communities at smaller spatial grains and extents. Finally,  
4 approaches that explicitly deal with differences in evenness (e.g., Shannon's diversity), can  
5 capture some of the differences observed among the SACs (e.g., Hill 1973, Chao et al. 2014a),  
6 but most studies only consider one measure at a time. Nevertheless, the approach we advocate  
7 below is similar to comparing comparison of multiple metrics that differentially weight common  
8 and rare species (e.g., Hill numbers; Hill 1973, Jost 2006, Chao et al. 2014a).

9  
10 Next, we describe a framework that can more explicitly tease apart how the underlying  
11 components of biodiversity, namely N, the SAD and aggregation, influence comparisons. This  
12 approach synthesizes many different types of biodiversity metrics that are frequently used in  
13 empirical studies. In a companion paper, we provide a detailed exploration of the statistical  
14 methodology necessary to make these comparisons in a spatially continuous framework,  
15 including benchmark tests and evaluation of statistical error, and provide an R package (*mobr*)  
16 that can be used to analyze both spatially implicit and explicit data on changes in biodiversity  
17 among treatments (McGlenn et al. *submitted*).

18

### 19 **Contrasting accumulation and rarefaction curves**

20 Here, we overview two types of SACs—sample-based accumulation and individual-based  
21 rarefaction—that can reveal the influence of different components that underlie changes in  
22 species richness across scales (Gotelli and Colwell 2001). We illustrate these curves and how  
23 they connect to more traditional metrics of biodiversity in Figure 4 and in Table 1.

1

2 **Sample-based accumulation curve**—This curve illustrates how the number of species (y-axis)  
3 accumulates as the number of samples (i.e., number of plots, quadrats, net sweeps, etc) (x-axis)  
4 is increased in a spatially-explicit way (Figure 4a). To accumulate samples spatially-explicitly,  
5 one starts with a single plot, then adds the closest plot, then the next closest plot, etcetera until all  
6 plots are included. Because the choice of the initial starting plot influences the shape of this  
7 curve, we recommend averaging the curve across multiple starting plots (also called spatially  
8 constrained rarefaction; Chiarucci et al. 2009). This average curve, and measurements of species  
9 richness at a given sampling scale, is sensitive to changes in all three components that underlie  
10 species richness (SAD, N, and aggregation) (e.g., Powell et al. 2013a, Chase and Knight 2013).

11

12 **Individual-based rarefaction curve**—In contrast to the above curve, which is the most similar  
13 to what the ecologist observes in the field, and is the most complex (retaining information on all  
14 three components), the individual-based rarefaction curve is the least complex and most derived  
15 from what is observed in the field. Specifically, the individual-based rarefaction curve plots  
16 species richness (y-axis) against number of individuals (x-axis) (Figure 4b). Individuals are  
17 pooled across all samples and selected at random, so that any spatial structure in intraspecific  
18 aggregation and differences in the numbers of individuals between plots is lost (e.g., Hurlbert  
19 1971, Simberloff 1972, Gotelli and Colwell 2001). The shape of the rarefaction curve (i.e., slope  
20 and asymptote) depends only on the SAD. Specifically, an individual-based rarefaction curve is  
21 influenced both by the relative abundances of the community (a more even community has a  
22 steeper sloped curve than a less even community), as well as the total number of species in the  
23 community (a community with higher richness has a higher asymptote than one with lower  
24 richness) (Hurlbert 1971, Olszewski 2004, Cayuela et al. 2015). The slope of the rarefaction

1 curve at its base is equivalent to the probability of interspecific encounter (Hurlbert 1971,  
2 Olszewski 2004) (see below for more details).

3

4 In individual-based rarefaction curves, we can pool and randomly sample individuals at multiple  
5 spatial scales. For example, if we have multiple sampling plots (e.g., replicates) within a given  
6 treatment, we can create an individual-based rarefaction curve for each sample and then average  
7 these curves to get a mean curve seen at the  $\alpha$ -scale (scale that represents the number of  
8 individuals found in a single sample; dashed line in Figure 4B). Or we can pool individuals  
9 across all plots into one large pool ( $\gamma$ -scale, solid line in Figure 4B). The difference between the  
10 two curves indicates some site-to-site variability (i.e.,  $\beta$ -diversity). If the  $\gamma$ -rarefaction curve rises  
11 much more steeply than the  $\alpha$ -rarefaction curve then this indicative of high  $\beta$ -diversity (spatial  
12 turnover of species composition). This results from the spatial aggregation of individuals within  
13 a species (causing a single plot to contain more individuals of one or a few species and thus  
14 fewer total species than if the individuals were spatially random) (Olszewski 2004, Dauby and  
15 Hardy 2012) (Figure 4b)

16

17 **Single-scale biodiversity measures**—Here we consider the case for which we only know one  
18 value for the observed numbers of species ( $S$ ) and for number of individuals ( $N$ ) per treatment.  
19 In this case, we focus on comparing  $S$  and  $N$  across treatments. While not a biodiversity metric  
20 per se,  $N$  is a critical feature of natural communities and differences in  $N$  can be quite useful for  
21 making inference about any observed changes in biodiversity metrics such as  $S$ . For example, if  
22  $S$  and  $N$  change between treatments, then at least some of the difference in  $S$  is likely due to

1 changes in N, whereas if N does not differ strongly, then the effects on S are more likely due to  
2 changes in the SAD and/or aggregation.

3

4 Second, we can explicitly evaluate the influence of changes in N on any changes in S by  
5 estimating rarefied species richness. Rarefaction is usually accomplished by rarefying the  
6 expected species richness given the lowest N observed among all samples. However, differences  
7 in rarefied species richness are also scale-dependent (e.g., Cao et al. 2007, Chase and Knight  
8 2013, Cayuela et al. 2015), and so a better approach is to measure rarefied richness at multiple  
9 values of N, which we refer to as  $S_n$ . Values of  $S_n$  can be compared to each other quickly across  
10 all scales by visually comparing whether one rarefaction curve is above or below another.

11

12 Third, many empiricists are interested in the total numbers of species in a given community,  
13 knowing that many might be undetected using typical survey methods. Chao and others (e.g.,  
14 Chao 1984, Chao et al. 2009, Colwell et al. 2012, Chiu et al. 2014a) have created a family of  
15 estimators that estimate the asymptote of the individual-based rarefaction curve (see e.g.,  
16 Colwell and Coddington 1994, Reese et al. 2014 for other types of estimators with similar goals).  
17 We refer to this as  $S_{\text{asymptote}}$ , although we note that its accuracy requires adequate sampling and  
18 other assumptions to be met (Chao et al. 2009, Reese et al. 2014).  $S_{\text{asymptote}}$  is highly correlated  
19 with observed S (McGill 2011b), but we can also use it to estimate the numbers of undetected  
20 species at either scale ( $S_{\text{asymptote}} - S$ ) (Chao et al. 2009) as an indicator the number of undetected  
21 rare species; this parameter is referred to as  $f_0$ .

22

1 Fourth,  $S$  is an imperfect descriptor of diversity in a community. Even after controlling for any  
2 differences in  $N$ , we could see differences in the shape of the individual-based rarefaction curve  
3 in its rising slope that are not captured simply by looking at  $S_n$  or  $S_{\text{asymptote}}$ . Specifically, while  
4 the asymptote of the curve is described by the total  $S$  in the community, the shape of the curve  
5 and how it rises is determined by the SAD, including the commonness and rarity of species (i.e.,  
6 evenness of the community). Olszewski (2004) showed how the slope of the rarefaction curve at  
7 its base (between  $N=1$  and  $N=2$ ) is equivalent to a relatively unbiased estimator of evenness in a  
8 community, the Probability of Interspecific Encounter (PIE) (Hurlbert 1971); with the PIE  
9 simply being  $1 - \text{Simpson's original index}$  (Jost 2006). A more even community (higher PIE)  
10 accumulates species more quickly with increasing  $N$  than a less even community (lower PIE).

11  
12 Given that individual-based rarefaction curves capture elements of the total species in a  
13 community as well as their relative abundances, they can also be used to visualize the diversity  
14 continuum known as Hill numbers. Hill (1973) showed that some of the most familiar metrics  
15 used to measure species diversity, including  $S$ , Shannon's index, and Simpson's index, differed  
16 in how they weight rare species (denoted with  $q$ ). Reyni's (1961) and Tsallis' (1988) entropies  
17 represent similar weighting continua (see also Keylock 2005, Jost 2006, Mendes et al. 2008,  
18 Chao et al. 2014a). Specifically, the upper-right part of the rarefaction curve where all species  
19 are weighted equally regardless of their abundance ( $q=0$ ) gives us  $S$ , and the slope at the lower-  
20 left (base) of the rarefaction curve pinpoints the other end of the Hill continuum ( $q=2$ ) at PIE  
21 ( $=1 - \text{Simpson's index}$ ), where common species are emphasized and rare species are down-  
22 weighted; Shannon's index ( $q=1$ ) is somewhere between these extremes.

23



1 For statistical comparisons, it is useful to convert diversity entropies (such as Shannon's or PIE)  
2 into an effective number of species (e.g., Hill 1973, Jost 2006, 2007). For PIE, the effective  
3 number of species ( $S_{PIE}$ ) is the number of equally abundant species it would take to yield a given  
4 value of PIE. For example, in a community where all species had the exact same abundances,  
5  $S_{PIE}$  would be equal to  $S$ . As the community becomes almost completely dominated by one  
6 species, but  $S$  stays the same so that all others are extremely rare, PIE decreases towards 0 and  
7  $S_{PIE}$  decreases towards 1. While Jost (2006, 2007) and others (e.g., Chao et al. 2014a) have  
8 suggested that Shannon's index (which is intermediate between  $S$  and Simpson's index ( $=1-PIE$ )  
9 in its weighting of rare species) has the best statistical properties, we argue that it is more  
10 informative to focus on more extreme measures at  $S$  and PIE, which capture more of the  
11 potential variation among communities. Nevertheless, a more complete view of points along the  
12 rarefaction curve can only benefit from comparisons of multiple orders of the Hill continuum.

13

14 **Two-scale biodiversity measures**—Above, we discussed each measure at a single sampling  
15 scale. However, we often have several plots (or replicates) for a given treatment. Using  
16 Whittaker's (1960) concept of multiplicative diversity partitioning ( $\gamma=\alpha*\beta$ ), we define  ${}^{\alpha}S$  as the  
17 *average*  $S$  per plot (=observational grain) and  ${}^{\gamma}S$  as the *count* of species ( $S$ ) across all samples,  
18 plots or replicates of a given comparison (=observational extent). Finally, we define the ratio  
19 of  ${}^{\gamma}S$  to  ${}^{\alpha}S$  as  $\beta_s (= {}^{\gamma}S/{}^{\alpha}S)$  to quantify how species are gained from small to large scales (i.e.,  $\beta$ -  
20 diversity)(we do not discuss other ways  $\beta$ -diversity is sometimes calculated, which address  
21 different questions (Tuomisto 2010a,b; Anderson et al. 2011). Although  $\beta$ -diversity is a useful  
22 concept, we note the caveat that its calculation assumes a linear difference from two scales of an  
23 inherently non-linear SAC, and thus is itself scale-dependent (e.g., MacNally et al. 2004, Nekola

1 and McGill 2014, Zhang et al. 2015, Tuomisto et al. 2017). However, other approaches to  
2 measuring scaling relationships (e.g., via the slope [z] of the species area relationship) are  
3 influenced by the same parameters we describe here.  
4  
5 Just as with  $\gamma S$  and  $\alpha S$ ,  $\beta_S$  is influenced by N, SAD, and aggregation. However, we can use the  
6 individual-based rarefaction curve collected from small and large scales to isolate the influence  
7 of aggregation on  $\beta$ -diversity from the influence of N and SAD (see McGlenn et al. *submitted* for  
8 a method based on a continuous scale of spatial grain to estimate the aggregation effect).  
9 Because the individual-based rarefaction curve randomly samples individuals regardless of their  
10 spatial position, it eliminates the influence of aggregation. But if we sample randomly from only  
11 a subset of the spatial distribution (i.e., the  $\alpha$ -scale), and there is strong intraspecific aggregation,  
12 the rarefaction curves from the smaller and larger scales will capture different amounts of this  
13 heterogeneity (Figure 4b). We can quantify this aggregation by comparing the slope of the  
14 rarefaction curve (i.e, PIE) of the two scales; the bigger the difference in PIE between the  $\alpha$ - and  
15  $\gamma$ -scale, the more aggregation there is. For comparisons, we convert to the effective numbers of  
16 species and take the ratio of small-scale ( $\alpha S_{PIE}$ ) to large-scale ( $\gamma S_{PIE}$ ) to yield an estimate of  $\beta$ -  
17 diversity ( $\beta_{S_{PIE}}$ ) that is driven primarily by aggregation of regionally common species.  
18 As above, the  $\beta$ -diversities described here are equivalent to those derived from Hill numbers  
19 calculated when all species have equal weights ( $=\beta_S$ ) and when common species are given much  
20 higher weights than rare species ( $=\beta_{S_{PIE}}$ ) (Jost 2007, Tuomisto 2010a,b). It may also be useful to  
21 compare other values of  $\beta$ -diversity using this framework, including  $\beta_{S_n}$  or  $\beta_{S_{asymptote}}$ .  
22

1 Our use of rarefaction curves makes a very important assumption that numbers of individuals are  
2 counted and that this is meaningful. This assumption is often not upheld in empirical case  
3 studies on organisms where N is difficult or impossible to distinguish (e.g., herbaceous plant  
4 communities), or in organisms where the sizes of individuals are so different that biomass might  
5 be a more reasonable way to indicate dominance in a community rather than N. Nevertheless, it  
6 is still possible to calculate 1-Simpson's index (=PIE) when other estimates of relative  
7 abundances are taken, though the interpretation is slightly different. In addition, there are  
8 imperfect ways to approximate the rarefaction methods we advocate here, for example using  
9 biomass or percent cover as a proxy for numbers of individuals.

10

## 11 **Comparing Species Accumulation and Rarefaction Curves**

12 To illustrate how N, SAD, and aggregation alter the shape of accumulation and rarefaction  
13 curves, we varied them in a simple spatial simulation using the R package mobsim (see  
14 <https://github.com/MoBiodiv/mobsim>) (May et al. 2017). We do not present all combinations of  
15 changes, but rather show how changing key components influence the sample-based  
16 accumulation (left panels) and individual-based rarefaction curves (right panels) (Figure 5).

17

### 18 *The effect of changing N*

19 When only the number of individuals changes, the SACs differ, but the individual-based  
20 rarefaction curves are on top of each other (but one extends further to the right; Figure 5A). This  
21 is sometimes referred to as the 'more individuals hypothesis' (Srivistava and Lawton 1999,  
22 Currie et al. 2004, Hurlbert and Jetz 2010), and can arise when some process (e.g., energy,  
23 predation) alters the numbers of individuals that can persist in a site.

1

## 2 *The effect of changing the SAD*

3 Although it is common to summarize the shape of the SAD with a single measure of evenness,  
4 we argue that it is better to distinguish two types of changes to the SAD: 1) Increasing  
5 dominance, which decreases PIE; or 2) adding more individuals of the rare species which will  
6 increase S, but have little effect on PIE (see also Thompson and Withers 2003). Any  
7 combination of these two scenarios is possible. Thus, dominance can change without affecting  
8 the rare species (Figure 5B), rare species can increase while dominance is unchanged (Figure  
9 5C), both dominance and rare species can increase or decrease in parallel (Figure 5D), or  
10 dominance can increase while rare species decline, leading to crossing curves (Figure 5E).  
11 Changes in the shape of the SAD are most often associated with changes from one community to  
12 another in the processes that shape coexistence, dominance and the persistence of rare species.

13

## 14 *The effect of changing spatial aggregation*

15 If individuals in a community are spatially random, the individual-based rarefaction would be  
16 identical at smaller and larger scales, as would the univariate parameters that describe this ( ${}^{\alpha}S_{PIE}$   
17 =  ${}^{\gamma}S_{PIE}$ ). However, if the individuals in a community are strongly aggregated, the smaller-scale  
18 curve will be shallower than the larger-scale curve ( ${}^{\alpha}S_{PIE} < {}^{\gamma}S_{PIE}$ ), leading to  $\beta_{S_{PIE}}$ . Aggregation  
19 can emerge from habitat heterogeneity, dispersal limitation, and a number of other processes.

20

## 21 **Components of species richness vary independently**

22 Is this complex decomposition of rarefaction curves really necessary? Empirical ecologists often  
23 suggest that because different measurements of biodiversity are often strongly correlated (e.g.,

1 species richness and Shannon's index), only one measure is needed to understand the response of  
2 biodiversity to ecological factors. Here we explicitly examine this claim to determine whether  
3 the extra complexity we advocate is necessary.

4  
5 In order to evaluate how strongly correlated the different measures of biodiversity are, we  
6 analyzed datasets for which we could calculate rarefaction curves from multiple sites within a  
7 given study. We specifically analyzed 37 datasets from a larger assemblage of datasets amassed  
8 by McGill 2011b that had species abundance data from at least two comparable local  
9 communities (data and references listed in Appendix 2). We compared whether differences  
10 among sites in  $N$  and the SAD (indicated by  $S_{PIE}$  and  $S$ ) were correlated. There was not enough  
11 spatial information within these datasets for us to examine aggregation. Example datasets  
12 include data from bird surveys along standardized routes in North America, marine benthic  
13 invertebrates collected from trawls along an environmental gradient, and arthropods on different  
14 host plants. Some of these datasets occurred along natural (e.g. latitudinal) or human-caused (e.g.  
15 oil leakage) environmental gradients. Other data sets were variable, but not arranged along any  
16 known gradient. Twenty-two of the datasets came from terrestrial ecosystems and 15 were from  
17 marine ecosystems, but we found no consistent differences between habitats. Most datasets  
18 compared 2-20 communities for comparisons; datasets with  $>20$  communities had 20 randomly  
19 selected so that they did not numerically dominate the results.

20  
21 First, we tested the idea that  $N$ ,  $S$  and  $S_{PIE}$  are redundant (correlated) by looking at the three  
22 bivariate relationships between  $S$ ,  $N$  and  $S_{PIE}$  using hierarchical linear models. Specifically, we  
23 modeled  $S_{PIE}$  as a function of  $N$ , and  $S$  as a function of either  $N$  or  $S_{PIE}$  using models with a fixed

1 effect to estimate the strength of the relationship across datasets, and random slopes and  
2 intercepts to examine variation between datasets. N and S were modelled assuming Poisson error  
3 and a log-link function, and  $S_{PIE}$  was log-transformed and modelled assuming Gaussian error; N,  
4  $S_{PIE}$  and S entered all models as log-transformed covariates. All models were fit in R (R  
5 Development Core Team 2017) using the lme4 package (Bates et al. 2015). To compare  
6 variation across versus between datasets, we quantified the marginal (fixed effect only) and  
7 conditional  $R^2$  (fixed + random effects) using the piecewiseSEM package (Lefcheck 2016).  
8  
9 Figure 6 shows that N and  $S_{PIE}$  were unrelated across all studies ( $R^2 = 0.02$ ), and that the  
10 relationships between S and N, and S and  $S_{PIE}$  were weak across studies ( $R^2 = 0.14-0.16$ ).  
11 Importantly, Figure 6 also shows that there is considerable variation in the bivariate relationships  
12 within individual datasets with trends in all directions. In particular, the variation explained when  
13 the relationships were allowed to vary between studies increased dramatically ( $R^2$  increases to  
14  $0.81 - 0.95$ ). Thus, specific ecosystems have correlations between these variables, but we do not  
15 know *a priori* what type or strength of correlation. Because these variables vary largely  
16 independently and in inconsistent directions, they likely contribute unique information that  
17 provides a more nuanced understanding of how biodiversity differs between sites.  
18  
19 Second, we evaluated a commonly held assumption that real-world rarefaction curves of  
20 comparable data do not usually cross, so that the rank order of diversity differences among  
21 communities is typically consistent (even if the effect sizes change) (but see, e.g., Lande et al.  
22 2000, Thompson and Withers 2003). For this analysis, we compared individual-based  
23 rarefaction curves for each pair of communities within a single dataset (Figure 7A). Across all

1 datasets, a total of 2203 pairwise comparisons were made and 732 pairs of rarefaction curves  
2 crossed each other (33% of all pairs) (some crossing multiple times) (Figure 7B). Importantly,  
3 the crossing points were not ecologically trivial (e.g., crossings only at very small N). The  
4 average crossing occurred at 24% of the total abundance in a community and the average vertical  
5 separation on curves that crossed was 6.3 species (vs an average of ~40 species in a community).  
6  
7 In sum, these analyses show that the different components (N, S,  $S_{PIE}$ ) of rarefaction curves  
8 among two or more communities are relatively independent, and that rarefaction curves often  
9 cross. Importantly, however, this analysis was able to compare only spatially implicit curves,  
10 and we were not able to address the role of spatial aggregation, which would further complicate  
11 comparisons that take a scale-agnostic perspective.

### 13 **Recommended protocol for analyses dissecting biodiversity data with a case study**

14 Here, we provide an empirical recipe for using multiple metrics at multiple scales to achieve  
15 deeper insights into the patterns and potential processes by which ecological drivers influence  
16 biodiversity. We first describe how one might address these questions generically, and then we  
17 illustrate this recipe with a re-analysis of an experiment on the effect of nutrient additions on  
18 macroinvertebrates and amphibians in experimental ponds (for full details, see Chase 2010).

19  
20 In a companion paper (McGlenn et al. *submitted*), and the *mobr* statistical package  
21 (<https://github.com/MoBiodiv/mobr>), we provide the methodology and R code for these analyses  
22 and how to dissect the influence of N, SAD and aggregation in a spatially continuous way. For  
23 these analyses, we used one-way PERMANOVA to assess the treatment effect on diversity at the

1  $\alpha$ -scale (=1 mesocosm) (permuted treatment group labels 999 times for significance). At the  $\gamma$ -  
2 scale (=15 mesocosms), we permuted treatment group labels across samples, pooled the groups,  
3 and calculated the difference in diversity between treatments for each permutation.

4

5 Results are illustrated in Figure 8; some results are not shown for brevity:

6

7 *Step 1: Do treatments affect the numbers of individuals of all species (N)?*

8 If treatments differ in N, then any difference in S between treatments may, in part, be due to  
9 treatment effects on N. We expect that N often scales linearly with increasing sampling (unlike  
10 S), and so it should not matter whether the average N per plot ( $\alpha$ -scale), or the total N across  
11 plots ( $\gamma$ -scale), are compared. In our case study, we found no influence of the nutrient addition  
12 treatment on N measured at either scale ( $P > 0.3$ ) (not shown in Figure).

13

14 *Step 2: Do treatments affect diversity responses at the  $\alpha$ -scale?*

15 a) *Do treatments affect  $\alpha S$ ?*

16 To address whether the treatment influences the number of species in a single plot, we  
17 compare  $\alpha S$  (or  $\alpha S_{\text{asymptote}}$ ) between the reference and treatment samples. In our case  
18 study,  $\alpha S$  was equivalent to  $\alpha S_{\text{asymptote}}$  for each treatment, and thus we just show results for  
19  $\alpha S$ . However, we note that if we had poorly sampled the diversity of each sample,  
20  $\alpha S_{\text{asymptote}}$  would have been a more appropriate response variable. If we find that the  
21 treatment does affect the species per sample, this could be due to effects of treatments on  
22 N and/or the SAD. Importantly, however, it is still useful to explore the steps below,  
23 even if there is no difference in  $\alpha S$ , because it is possible that (1) changes to N and the



1 SAD can have equal but opposite effects on their influence on  $\alpha S$  (e.g., if the treatment  
2 changes both N and the SAD), or (2) that effects only emerge at larger scales. In our case  
3 study,  $\alpha S$  did not differ between the treatments (Fig. 8a).

4  
5 *b) Do treatments affect  $\alpha S_n$ ? Dissecting the influence of N*

6 If there are large differences in N among treatments (as in Step 1), it is possible that the  
7 results for  $\alpha S$  and  $\alpha S_n$  will differ owing to the treatment effect on N. For example, if a  
8 significant treatment effect on  $\alpha S$  is no longer significant for  $\alpha S_n$ , we can conclude that  
9 the effect on  $\alpha S$  was primarily due to differences in N between treatments, rather than due  
10 to differences the SAD. However, if there remains a difference in  $\alpha S_n$ , we can conclude  
11 that some of the treatment difference in  $\alpha S$  was due to changes in the SAD. It is even  
12 possible that the effects can shift between  $\alpha S$  and  $\alpha S_n$ . For example, McCabe and Gotelli  
13 (2000) showed that  $\alpha S$  was higher for stream invertebrates in undisturbed treatments, but  
14 that this effect was reversed when the effect of disturbance on N was discounted; whereas  
15  $\alpha S_n$  was higher in disturbed treatments. Nevertheless, in our case study, because there  
16 was no difference in N between treatments, the effects on  $\alpha S_n$  were the same as for  $\alpha S$  and  
17 did not differ among treatments (result not shown in figure).

18  
19 *c) Do treatments differ in  $\alpha S_{PIE}$ ? Dissecting the influence of SAD*

20 If there is a difference in  $\alpha S_n$  from above, we can infer that the SAD has changed between  
21 the treatments. However, the SAD can change by influencing either the common species  
22 or the rare species in a community. A difference in  $\alpha S_{PIE}$  between treatments emphasizes a

1 change in the dominance patterns of common species in a community. Thus, if a  
2 treatment decreases the value of  $\alpha S_{PIE}$ , this indicates that the treatment has caused species  
3 to become increasingly dominant, and if it increases  $\alpha S_{PIE}$ , this means that dominance has  
4 decreased and the community has become more even. Alternatively, it is possible that  
5  $\alpha S_{PIE}$  could not vary (or vary little), with a large influence of the treatment on  $\alpha S_n$ . This  
6 would imply that rarer species that do not influence PIE are responding to the treatment.  
7 It is also possible to directly estimate how a treatment might influence rare species (e.g.,  
8  $f_0$  described above), but this requires an estimate of undetected (rare) species, which was  
9 not true in our case study. Instead, our case study showed that that there was no  
10 influence of treatment on  $\alpha S_{PIE}$  (Figure 8b) or  $\alpha S$  (above), and thus treatments did not  
11 differ in the shape of the SAD at the local scale.

12

13 In sum, none of the response variables of interest were significantly different at the  $\alpha$ -scale. Had  
14 we stopped here, at a majority of biodiversity experiments do, we might conclude that there was  
15 no interesting influence of nutrients on biodiversity. However, by looking at the  $\gamma$ -scale (i.e.,  
16 species richness across all mesocosms), we see that this conclusion is wrong.

17

18 *Step 3: Do treatments affect diversity responses at the  $\gamma$ -scale?*

19 *a) Do treatments affect  $\gamma S$ ?*

20 As in Step 2a, but at the regional scale. Again, any observed treatment level differences  
21 could result from changes in N or the regional-scale SAD. And importantly, the local and  
22 regional scale SAD need not be the same. For example, if there is strong intraspecific  
23 aggregation among plots (which is typical; McGill 2010), as might result from habitat

1 heterogeneity or dispersal limitation, we can expect the shapes of regional and local SADs to  
2 differ. In our case study, and in contrast to the local scale results ( $\alpha S$ ), we found a significant  
3 increase in  $\gamma S$  in the nutrient added treatments relative to the controls (Fig. 8c).

4  
5 *b) Do treatments affect  $\gamma S_n$ ? Dissecting the influence of regional N*

6 As in Step 2b, but at the regional scale. As above, rarefying species richness to a common N  
7 removes any influence of N on S, such that any observed differences in  $\gamma S_n$  are due to  
8 changes in the regional SAD, which itself is a product of the local SAD and aggregation. In  
9 our case study, because we found no differences in N among treatments, the results for  $\gamma S_n$   
10 was the same as for  $\gamma S$  (not shown).

11  
12 *c) Do treatments differ in  $\gamma S_{PIE}$ ? Dissecting the influence of the regional SAD*

13 As in Step 2c, but at the regional scale. As above, this allows us to determine whether any  
14 differences observed in species richness are due to changes in the dominance of common  
15 species, which would influence  $\gamma S_{PIE}$ , or instead due to changes in rare species, which would  
16 only influence  $\gamma S_n$  (and direct measures of rarity, such as  $f_0$ ). In our case study, there were no  
17 differences in  $\gamma S_{PIE}$  among treatments (Fig. 8d), despite the fact that  $\gamma S$  (and  $\gamma S_n$ ) did change.

18  
19 Overall, our case study showed that  $\gamma$ -scale results differed from  $\alpha$ -scale results. Specifically,  $\gamma S$   
20 increased with nutrient additions, but not  $\gamma S_{PIE}$ . This suggests that it is the rare species end of the  
21 SAD that changed among the treatments; added nutrients allowed more rare species to persist  
22 regionally, but not locally. Further, the qualitatively different results at the  $\gamma$ - and  $\alpha$ -scale implies  
23 that  $\beta$ -diversity was influenced by the nutrient addition treatment.

1

2 *Step 4: Do treatments affect  $\beta$ -diversity?*

3  $\beta$ -diversity results reflect the contrast between the  $\alpha$ - and  $\gamma$ -scale. Just as with the other scales,  
4 we can evaluate  $\beta$ -diversity as turnover of all species ( $\beta_s$ ) and of the primarily dominant species  
5 ( $\beta_{S_{PIE}}$ ). If the differences between the  $\alpha$ - and  $\gamma$ -scale patterns were driven by one treatment  
6 causing strong shifts in dominance and interspecific aggregations from site to site, as might  
7 happen if a treatment creates strong compositional heterogeneity, we would expect this to be  
8 reflected in treatment-level effects on  $\beta_{S_{PIE}}$ . If instead, differences between the  $\alpha$ - and  $\gamma$ -scale  
9 were driven by one treatment causing more by site to site replacements in rare species, either as a  
10 result of ecological drift, dispersal limitation, or some frequency-dependent process, this would  
11 be reflected only in  $\beta_s$ . In our case study, we found strong effects of nutrient addition on the  $\beta_s$   
12 (Fig. 8e), but not  $\beta_{S_{PIE}}$  (Fig. 8h). This emphasizes that a core group of common species were  
13 present across replicates in both treatments, and that a group of rarer species were largely  
14 responsible for the treatment-level responses at the  $\gamma$ -scale. Specifically, there was more  
15 turnover among those rare species in the high nutrient treatment; this likely resulted from  
16 ecological drift and/or priority effects that were initiated at the beginning of the experiment.

17

## 18 **Conclusions**

19 There are multiple pathways by which ecological factors can influence biodiversity across  
20 multiple scales, but most of studies continue to rely on comparisons of a single summary  
21 variable—usually species richness (S)—at a single spatial scale. As a consequence, despite  
22 thousands of published studies quantifying how species richness changes in response to natural  
23 and anthropogenic drivers, we know much less than we think about how and why biodiversity

1 changes from place to place and time to time. This is particularly problematic when trying to  
2 achieve synthesis across multiple studies of multiple ecological drivers, through meta-analyses  
3 and other means, because effect sizes are highly confounded by spatial scale (see also Chase and  
4 Knight 2013). We are currently limited in our ability to create realistic ‘biodiversity scenario’  
5 models that project future biodiversity loss in response to changing ecological conditions.

6

7 To move forward, it is critical to consider the factors that underlie  $S$  and how it scales from local  
8 to regional spatial scales. Specifically,  $S$  at any given scale is determined the number of  
9 individuals and the SAD, as well as the degree of spatial clumping or interspecific aggregation  
10 that alters the SAD from smaller to larger scales. Fortunately, there is a rich literature on other  
11 measures of biodiversity that can explicitly complement comparisons of  $S$ , and there are easy  
12 ways that empiricists can explicitly deal with issues of spatial scaling (i.e., replicates nested  
13 within treatments). We have advocated for measures of biodiversity that can explicitly account  
14 for the factors underlying  $S$  and its scaling via consideration of different aspects of the  
15 individual-level rarefaction curve that emphasize different underlying components (e.g.,  $S_n$ ,  $S_{PIE}$ ,  
16 at the  $\alpha$  and  $\gamma$  scales). For a majority of studies, these can be estimated in a straightforward way  
17 with data that are already, or could be, collected.

18

19 The approach we advocate will often require more complex collecting and reporting of data (i.e.,  
20 total relative abundances at multiple scales) and more complex analyses with multiple response  
21 variables. This will create a more nuanced view of what biodiversity is and how it varies—  
22 biodiversity is not a single number, and it cannot be compared at a single scale to estimate how it  
23 responds to ecological factors. However, this more nuanced view is necessary to resolve long-

1 standing debates. For example, Blowes et al. (2017) recently used an approach similar to the one  
2 we advocate here to show that the debate about whether environmental versus historical  
3 biogeographic controls influence global biodiversity patterns of reef associated fishes can be  
4 resolved by dissecting patterns of species richness in a scale-explicit way.

5  
6 Finally, there are many extensions of the approach that we advocate which are necessary to be  
7 able to fully understand, and synthesize, how biodiversity changes in time and space. First, as  
8 we mentioned above, the approach we have taken here views scale in a categorical way (e.g.,  
9  $\alpha$ ,  $\beta$ ,  $\gamma$ -diversity), while scale is continuous. In a companion paper, we develop a scale-  
10 continuous methodology (McGlinn et al. *submitted*). Second, we have only focused on  
11 taxonomic diversity, although interest in other measures of diversity has increased greatly in  
12 recent years. These measures, such as functional and phylogenetic diversity, show patterns of  
13 scaling similar to taxonomic diversity (e.g., Morlon et al. 2011, Smith et al. 2013) and will thus  
14 show scale-dependence when making comparisons. Approaches similar to those advocated here  
15 are emerging for these other types of diversity (Chao et al. 2014b, 2015, Chiu et al. 2014b), and  
16 so we anticipate that a family of approaches for comparing scale-dependent diversity responses  
17 to ecological drivers at multiple levels of organization will soon emerge.

## 18 19 **Acknowledgements**

20 This paper emerged from several working group meetings and extended visits funded by the  
21 German Centre of Integrative Biodiversity Research (iDiv) Halle-Jena-Leipzig (funded by the  
22 German Research Foundation; FZT 118) and the Alexander von Humboldt Foundation as part of  
23 the Alexander von Humboldt Professorship of TMK. DJM was also supported by the College of

1 Charleston startup funding. NJG was supported by U.S. NSF DEB 1257625. BJM was  
2 supported by USDA Hatch grant to MAFES #1011538 and NSF ABI grant #1660000. In  
3 addition, we thank F. Walter for help extracting data for the meta-analysis presented in Figure 2,  
4 and J. Belmaker, N. Sanders, D. Storch, and a number of other colleagues that helped us to  
5 develop and reform these ideas and tools.

6

## 7 **Literature Cited**

8 Alroy, J., (2017). Effects of habitat disturbance on tropical forest biodiversity. *Proc. Natl. Acad.*  
9 *Sci.* 114, 6056–6061.

10

11 Anderson, M.J., Crist, T.O., Chase, J.M., Vellend, M., Inouye, B.D., Freestone, A.L., et al,  
12 (2011). Navigating the multiple meanings of  $\beta$  diversity: a roadmap for the practicing ecologist.  
13 *Ecol. Lett.*, 14, 19-28.

14

15 Bates, D., Maechler, M., Bolker, B. and Walker, S., (2014). lme4: Linear mixed-effects models  
16 using Eigen and S4. *R package version*, 1(7), pp.1-23.

17

18 Blowes, S. A., Belmaker, J., and Chase, J. M. (2017). Global reef fish richness gradients emerge  
19 from divergent and scale-dependent component changes. *Proc. R. Soc. B* 284, 20170947

20

21 Cao, Y., Hawkins, C.P., Larsen, D.P. and Van Sickle, J., (2007). Effects of sample  
22 standardization on mean species detectabilities and estimates of relative differences in species  
23 richness among assemblages. *Am. Nat.*, 170, 381-395.

- 1
- 2 Cayuela, L., Gotelli, N.J. and Colwell, R.K., (2015). Ecological and biogeographic null  
3 hypotheses for comparing rarefaction curves. *Ecol. Monog.*, 85, 437-455.
- 4
- 5 Chao, A., (1984). Nonparametric estimation of the number of classes in a population. *Scand. J.*  
6 *Stat.*, 11, 265-270
- 7
- 8 Chao, A. and Jost, L., (2012). Coverage-based rarefaction and extrapolation: standardizing  
9 samples by completeness rather than size. *Ecology*, 93, 2533-2547.
- 10
- 11 Chao, A., Colwell, R.K., Lin, C.W. and Gotelli, N.J., (2009). Sufficient sampling for asymptotic  
12 minimum species richness estimators. *Ecology*, 90, 1125-1133.
- 13
- 14 Chao, A., Gotelli, N.J., Hsieh, T.C., Sander, E.L., Ma, K.H., Colwell, R.K. and Ellison, A.M.,  
15 (2014a). Rarefaction and extrapolation with Hill numbers: a framework for sampling and  
16 estimation in species diversity studies. *Ecol. Monog.*, 84, 45-67.
- 17
- 18 Chao, A., Chiu, C.H. and Jost, L., (2014b). Unifying species diversity, phylogenetic diversity,  
19 functional diversity, and related similarity and differentiation measures through Hill numbers.  
20 *Annu. Rev. Ecol. Syst.*, 45, 297-324.
- 21
- 22 Chao, A., Chiu, C.H., Hsieh, T.C., Davis, T., Nipperess, D.A. and Faith, D.P., (2015).  
23 Rarefaction and extrapolation of phylogenetic diversity. *Methods Ecol. Evol.*, 6, 380-388.



- 1
- 2 Chase, J.M. and Leibold, M.A., (2002). Spatial scale dictates the productivity–biodiversity  
3 relationship. *Nature*, 416, 427-430.
- 4
- 5 Chase, J.M., (2010). Stochastic community assembly causes higher biodiversity in more  
6 productive environments. *Science*, 328, 1388-1391.
- 7
- 8 Chase, J. M., and Knight, T. M. (2013). Scale-dependent effect sizes of ecological drivers on  
9 biodiversity: why standardised sampling is not enough. *Ecol. Lett.*, 16, 17-26.
- 10
- 11 Chiarucci, A., Bacaro, G., Rocchini, D., Ricotta, C., Palmer, M. and Scheiner, S., (2009).  
12 Spatially constrained rarefaction: incorporating the autocorrelated structure of biological  
13 communities into sample-based rarefaction. *Comm. Ecol.*, 10, 209-214.
- 14
- 15 Chiu, C.H., Wang, Y.T., Walther, B.A. and Chao, A., (2014a). An improved nonparametric  
16 lower bound of species richness via a modified Good–Turing frequency formula. *Biometrics*, 70,  
17 671-682.
- 18
- 19 Chiu, C.H., Jost, L. and Chao, A., (2014b). Phylogenetic beta diversity, similarity, and  
20 differentiation measures based on Hill numbers. *Ecol. Monog.*, 84, 21-44.
- 21
- 22 Colwell, R.K. and Coddington, J.A., (1994). Estimating terrestrial biodiversity through  
23 extrapolation. *Phil. Trans. Roy. Soc B*, 345, 101-118.

- 1
- 2 Colwell, R.K., Chao, A., Gotelli, N.J., Lin, S.Y., Mao, C.X., Chazdon, R.L. et al. (2012). Models  
3 and estimators linking individual-based and sample-based rarefaction, extrapolation and  
4 comparison of assemblages. *J. Plant Ecol.*, 5, 3-21.
- 5
- 6 Currie, D.J., Mittelbach, G.G., Cornell, H.V., Field, R., Guégan, J.F., Hawkins, B.A., et al.  
7 (2004). Predictions and tests of climate-based hypotheses of broad-scale variation in taxonomic  
8 richness. *Ecol. Lett.*, 7, 1121-1134.
- 9
- 10 Dauby, G. and Hardy, O.J., (2012). Sample-based estimation of diversity sensu stricto by  
11 transforming Hurlbert diversities into effective number of species. *Ecography*, 35, 661-672.
- 12
- 13 Dumbrell, A.J., Clark, E.J., Frost, G.A., Randell, T.E., Pitchford, J.W. and Hill, J.K., (2008).  
14 Changes in species diversity following habitat disturbance are dependent on spatial scale:  
15 theoretical and empirical evidence. *J. Appl. Ecol.*, 45, 1531-1539.
- 16
- 17 Gotelli, N.J. and Colwell, R.K., (2001). Quantifying biodiversity: procedures and pitfalls in the  
18 measurement and comparison of species richness. *Ecol. Lett.*, 4, 379-391.
- 19
- 20 He, F. and Legendre, P., (2002). Species diversity patterns derived from species–area models.  
21 *Ecology*, 83, 1185-1198.
- 22

- 1 Hill, M.O., (1973). Diversity and evenness: a unifying notation and its consequences. *Ecology*,  
2 54, 427-432.
- 3
- 4 Hill, J.K. and Hamer, K.C., (2004). Determining impacts of habitat modification on diversity of  
5 tropical forest fauna: the importance of spatial scale. *J. Appl. Ecol.*, 41, 744-754.
- 6
- 7 Hurlbert, A.H. and Jetz, W., (2010). More than “more individuals”: the nonequivalence of area  
8 and energy in the scaling of species richness. *Am. Nat.*, 176, E50-E65.
- 9
- 10 Hurlbert, S.H., (1971). The nonconcept of species diversity: a critique and alternative  
11 parameters. *Ecology*, 52, 577-586.
- 12
- 13 James, F.C. and Wamer, W. O. (1982). Relationships between temperate forest bird communities  
14 and vegetation structure. *Ecology*, 63, 159-171.
- 15
- 16 Jost, L., (2006). Entropy and diversity. *Oikos*, 113, 363-375.
- 17
- 18 Jost, L., (2007). Partitioning diversity into independent alpha and beta components. *Ecology*, 88,  
19 2427-2439.
- 20
- 21 Keil, P., Biesmeijer, J.C., Barendregt, A., Reemer, M. and Kunin, W.E., (2011). Biodiversity  
22 change is scale-dependent: an example from Dutch and UK hoverflies (Diptera, Syrphidae).  
23 *Ecography*, 34, 392-401.

1

2 Keylock, C. J. (2005), Simpson diversity and the Shannon–Wiener index as special cases of a  
3 generalized entropy. *Oikos*, 109, 203–207.

4

5 Lan Z, Jenerette GD, Zhan S, Li W, Zheng S, Bai Y (2015a). Testing the scaling effects and  
6 mechanisms of N-induced biodiversity loss: evidence from a decade-long grassland experiment.  
7 *J. Ecol.* 103, 750-760.

8

9 Lan Z, Jenerette GD, Zhan S, Li W, Zheng S, Bai Y (2015b). Data from: Testing the scaling  
10 effects and mechanisms of N-induced biodiversity loss: evidence from a decade-long grassland  
11 experiment. Dryad Digital Repository. <https://doi.org/10.5061/dryad.h7893>

12

13 Lande, R., (1996). Statistics and partitioning of species diversity, and similarity among multiple  
14 communities. *Oikos*, 5-13.

15

16 Lande, R., DeVries, P.J. and Walla, T.R., (2000). When species accumulation curves intersect:  
17 implications for ranking diversity using small samples. *Oikos*, 89, 601-605.

18

19 Lefcheck, J.S., (2016). *piecewiseSEM: Piecewise structural equation modelling in r for ecology,*  
20 *evolution, and systematics. Meth. Ecol. Evol.*, 7, 573-579.

21

- 1 MacNally, R., Fleishman, E., Bulluck, L.P. and Betrus, C.J., (2004). Comparative influence of  
2 spatial scale on beta diversity within regional assemblages of birds and butterflies. *J. Biogeog.*,  
3 31, 917-929.  
4
- 5 MacArthur, R.H. and MacArthur, J.W., (1961). On bird species diversity. *Ecology*, 42, 594-598.  
6
- 7 May, F., Gerstner, K. . McGlenn, D. J., Xiao, X and Chase, J. M. (2017) mobsim: An R package  
8 for the simulation and measurement of biodiversity across spatial scales. *bioRxiv* (2017):  
9 209502.  
10
- 11 McCabe, D.J. and Gotelli, N.J., (2000). Effects of disturbance frequency, intensity, and area on  
12 assemblages of stream macroinvertebrates. *Oecologia*, 124, 270-279.  
13
- 14 McGill, B. J. (2010). Towards a unification of unified theories of biodiversity. *Ecol. Lett.* 13,  
15 627-642.  
16
- 17 McGill, B. J. (2011a). Linking biodiversity patterns by autocorrelated random sampling. *Am. J.*  
18 *Bot.*, 98, 481-502.  
19
- 20 McGill, B. J. (2011b). Species abundance distributions. In. A. Magurran and B. McGill (eds)  
21 *Biological diversity: frontiers in measurement and assessment*. Oxford University Press, Oxford  
22 (2011) 105-122.  
23

- 1 McGlinn, D.J. and Palmer, M.W., (2009). Modeling the sampling effect in the species–time–area  
2 relationship. *Ecology*, 90, 836-846.  
3
- 4 McGlinn, D. Xiao, X., May, F. Gotteli, N. J., Blowes, S. A., Knight, T. M. et al. Submitted.  
5 MoB (Measurement of Biodiversity): a method to separate the scale-dependent effects of species  
6 abundance distribution, density, and aggregation on diversity change. Submitted to *Meth. Ecol.*  
7 *Evol.*  
8
- 9 Mendes, R.S., Evangelista, L.R., Thomaz, S.M., Agostinho, A.A. and Gomes, L.C., (2008). A  
10 unified index to measure ecological diversity and species rarity. *Ecography*, 31, 450-456.  
11
- 12 Morlon, H., Schwik, D. W. Bryant, L. A., Marquet, P. A., Rebelo, A. G. et al. (2011). Spatial  
13 patterns of phylogenetic diversity. *Ecol. Lett.* 14, 141-149.  
14
- 15 Nekola, J.C. and McGill, B.J., (2014). Scale dependency in the functional form of the distance  
16 decay relationship. *Ecography*, 37, 309-320.  
17
- 18 Newbold, T., Boakes, E.H., Hill, S.L., Harfoot, M.B. and Collen, B., (2017). The present and  
19 future effects of land use on ecological assemblages in tropical grasslands and savannas in  
20 Africa. *Oikos*, 126, 1760–1769.  
21
- 22 Olszewski, T.D., (2004). A unified mathematical framework for the measurement of richness  
23 and evenness within and among multiple communities. *Oikos*, 104, 377-387.

1

2 Palmer, M.W. and White, P.S., (1994). Scale dependence and the species-area relationship. *Am.*  
3 *Nat.*, 144, 717-740.

4

5 Powell, K.I., Chase, J.M. and Knight, T.M., (2011). A synthesis of plant invasion effects on  
6 biodiversity across spatial scales. *Am. J. Bot.*, 98, 539-548.

7

8 Powell, K.I., Chase, J.M. and Knight, T.M., (2013a). Invasive plants have scale-dependent  
9 effects on diversity by altering species-area relationships. *Science*, 339(6117), pp.316-318.

10

11 Powell, K.I., Chase, J.M. and Knight, T.M., (2013b) Data from: Invasive plants have scale-  
12 dependent effects on diversity by altering species-area relationships. Dryad Digital Repository.  
13 <https://doi.org/10.5061/dryad.qq08m>

14

15 Preston, F.W., (1960). Time and space and the variation of species. *Ecology*, 41, 611-627.

16

17 R Core Team (2017). R: A language and environment for statistical computing. R Foundation for  
18 Statistical Computing, Vienna, Austria. URL <http://www.R-project.org/>.

19

20 Reese, G. C., Wilson, K. R. and Flather, C. H. (2014), Performance of species richness  
21 estimators across assemblage types and survey parameters. *Global Ecology and Biogeography*,  
22 23: 585–594.

23

- 1 Rényi, A., (1961). On measures of entropy and information. In Proceedings of the Fourth  
2 Berkeley Symposium on Mathematical Statistics and Probability, Volume 1: Contributions to the  
3 Theory of Statistics. The Regents of the University of California.  
4
- 5 Sandel, B. and Smith, A.B., (2009). Scale as a lurking factor: incorporating scale-dependence in  
6 experimental ecology. *Oikos*, 118, 1284-1291.  
7
- 8 Scheiner, S. M., Cox, S.B., Mittelbach, G.G., Osenberg, C. and Kaspari, M., (2000). Species  
9 richness, species–area curves and Simpson’s paradox. *Evol. Ecol. Res.* 2, 791-802.  
10
- 11 Simberloff, D., (1972). Properties of the rarefaction diversity measurement. *Am. Nat.* 106, 414-  
12 418.  
13
- 14 Smith, A.B., Sandel, B., Kraft, N.J. and Carey, S., (2013). Characterizing scale-dependent  
15 community assembly using the functional-diversity-area relationship. *Ecology*, 94, 2392-2402.  
16
- 17 Srivastava, D.S. and Lawton, J.H., (1998). Why more productive sites have more species: an  
18 experimental test of theory using tree-hole communities. *Am. Nat.*, 152, 510-529.  
19
- 20 Thompson, G.G. and Withers, P.C., (2003). Effect of species richness and relative abundance on  
21 the shape of the species accumulation curve. *Aust. Ecol.*, 28, 355-360.  
22



- 1 Tsallis, C.. (1988). Possible generalization of Boltzmann-Gibbs statistics. *J. Stat. Phys.*, 52, 479–  
2 487.  
3
- 4 Tuomisto, H., (2010a). A diversity of beta diversities: straightening up a concept gone awry. Part  
5 1. Defining beta diversity as a function of alpha and gamma diversity. *Ecography*, 33, 2-22.  
6
- 7 Tuomisto, H., (2010b). A diversity of beta diversities: straightening up a concept gone awry. Part  
8 2. Quantifying beta diversity and related phenomena. *Ecography*, 33, 23-45.  
9
- 10 Tuomisto, H., Ruokolainen, K., Vormisto, J., Duque, A., Sánchez, M., Paredes, V.V. et al.,  
11 (2017). Effect of sampling grain on patterns of species richness and turnover in Amazonian  
12 forests. *Ecography*, 40, 840-852.  
13
- 14 Whittaker, R.H., (1960). Vegetation of the Siskiyou mountains, Oregon and California. *Ecol.*  
15 *Monog.*, 30, 279-338.  
16
- 17 Whittaker, R.J., (2010). Meta-analyses and mega-mistakes: calling time on meta-analysis of the  
18 species richness-productivity relationship. *Ecology*, 91, 2522-2533.  
19
- 20 Zhang, Y., Ma, K., Anand, M., Ye, W. and Fu, B., (2015). Scale dependence of the beta  
21 diversity-scale relationship. *Comm. Ecol.*, 16, 39-47.  
22

1 **Table 1.** Definitions and interpretations of the biodiversity metrics for scale-explicit analyses.

| Metric                                                             | Definition                                                                                                                                           | Interpretation                                                                                                                                                     |
|--------------------------------------------------------------------|------------------------------------------------------------------------------------------------------------------------------------------------------|--------------------------------------------------------------------------------------------------------------------------------------------------------------------|
| $N$                                                                | Total numbers of individuals                                                                                                                         | Measure of density of individuals. Because $N$ scales roughly linearly with area (i.e. density is scale-independent) we do not need to measure at multiple scales. |
| ${}^{\alpha}S, {}^{\gamma}S$                                       | Observed richness of species from $\alpha$ -scale (average of observations) and from $\gamma$ -scale (sum of observations) local scale observations. | Number of species at local scale (= $\alpha$ -diversity) and large scale (= $\gamma$ -diversity)                                                                   |
| ${}^{\alpha}S_n, {}^{\gamma}S_n$                                   | The expected richness for $n$ randomly sampled individuals (Hurlbert 1971). Can be calculated from $\alpha$ - or $\gamma$ -scale.                    | Estimate of richness at $\alpha$ - or $\gamma$ -scale after controlling for differences due to aggregation and number of individuals (i.e., only reflects SAD)     |
| ${}^{\alpha}S_{\text{asymptote}}, {}^{\gamma}S_{\text{asymptote}}$ | Extrapolated richness at $\alpha$ - or $\gamma$ -scale (most typically estimated via Chao1 estimator; Chao 1984).                                    | Richness at $\alpha$ - or $\gamma$ -scale that includes unknown species but is highly correlated with $S$ (McGill, 2011b)                                          |

|                                                |                                                                                                                                          |                                                                                                                                    |
|------------------------------------------------|------------------------------------------------------------------------------------------------------------------------------------------|------------------------------------------------------------------------------------------------------------------------------------|
| $\alpha f_0, \gamma f_0$                       | Richness of undetected species<br>( $S_{\text{asymptote}} - S$ , Chao et al. 2009).<br>Can be measured at $\alpha$ - or $\gamma$ -scale. | Measure of rarity, slope at top of rarefaction curve, more sensitive to rare species than $S$                                      |
| $\alpha \text{PIE}, \gamma \text{PIE}$         | Probability of intraspecific encounter ( $S_{n=2} - S_{n=1}$ , Hurlbert 1971, Olszewski 2004)                                            | Measure of evenness, slope at base of the rarefaction curve, and sensitive to common species                                       |
| $\alpha S_{\text{PIE}}, \gamma S_{\text{PIE}}$ | Equally abundant species needed to yield PIE (Jost 2006) ( $=1/(1-\text{PIE})$ )                                                         | Effective number of species of PIE (=1-Simpson's) that is easier to compare with $S$                                               |
| $\beta_S$                                      | Ratio of total treatment $\gamma S$ and average plot $\alpha S$ (Whittaker, 1960)                                                        | More species turnover results in larger $\beta_S$ because of increases in spatial aggregation, $N$ , and/or unevenness of the SAD. |
| $\beta_{S_{\text{PIE}}}$                       | Ratio of total treatment $\gamma S_{\text{PIE}}$ and $\alpha S_{\text{PIE}}$ (Olszewski 2004, Jost 2007)                                 | Like $\beta_S$ but emphasizes common species.<br>Higher $\beta_{S_{\text{PIE}}}$ due to aggregation.                               |

1

1 **Figure Legends:**

2 **Figure 1.** (A) Effects of a dominant invasive plant (*Dianella ensifolia*) on the species richness of  
3 plants in the understory of Hardwood Hammock forests in central Florida, USA (data from  
4 Powell et al. 2013b). Data show species richness for three pairs of invaded and uninvaded sites  
5 at two nested spatial grains (1m<sup>2</sup> and 500m<sup>2</sup>). (B) Effects of N addition (6 treatments) to a  
6 Mongolian grassland on species richness measured at two spatial grains (1m<sup>2</sup> and 25m<sup>2</sup>) (data  
7 from Lan et al. 2015b).

8  
9 **Figure 2.** (A) Hypothetical comparison of effect sizes (i.e., log response ratio) measured at  
10 larger and smaller spatial scales. (B) Results of a meta-analysis of scale-dependent responses to  
11 a number of different ecological factors. Points represent the log response ratio of an ecological  
12 factor in a given comparison measured at the smallest (x-value) and largest (y-value) scale. We  
13 defined the reference treatment as the one with the highest level of richness at the small scale and  
14 took the absolute value of the log-ratio effect size, so that the distribution of effect sizes was  
15 limited mostly to the positive direction. The solid line indicates the 1:1 line expected if effect  
16 sizes were not scale-dependent. Points above and below this line indicate effect sizes that are  
17 larger or smaller, respectively, as scale increases; points that are negative on the y-axis indicate  
18 those where the direction of the effect shifted from smaller to larger scales. Because of the way  
19 the reference treatment was defined, it is not possible to get negative values at the small scale.  
20 Overall, effect sizes at the smallest scale was correlated with the effect size observed at the larger  
21 scale ( $P < 0.05$ ), however, this relationship had poor predictive power ( $R^2 = 0.14$ ).

22  
23 **Figure 3.** A hypothetical depiction of three different communities (labelled A, B, C) each with a  
24 different Species Accumulation Curve (SAC). Each community can be sampled at different

1 scales (area or number of individuals), labelled Scale 1-3, showing how sampling scale can lead  
2 to different rankings of community in terms of species richness. Curves can diverge, leading to  
3 increasing in differences with scale (compare communities A vs C), they can converge, leading  
4 to decreases in differences with scale (communities B vs. C), or they can intersect and cross,  
5 where species richness is greater for one community at one scale ( $B > A$  at scale 1), but greater for  
6 another community at another scale ( $A > B$  at scales 2 & 3).

7  
8

9 **Figure 4.** (A) Sample-based accumulation curve where average number of individuals in a  
10 sample is defined as the  $\alpha$ -scale (first vertical line), and the total number of individuals across  
11 samples is defined as the  $\gamma$ -scale (second vertical line). From this, we can derive local richness  
12 ( $^{\alpha}S$ ), regional richness ( $^{\gamma}S$ ), and  $\beta$ -richness ( $\beta_s = ^{\gamma}S / ^{\alpha}S$ ). (B) individual-based rarefaction curve  
13 from  $\alpha$ -scale samples (dashed line) and  $\gamma$ -scale samples (solid line). From this, we can visualize  
14  $S$ , PIE for each scale ( $^{\alpha}PIE$ ,  $^{\gamma}PIE$ ), and the difference between them ( $\beta_{PIE}$ ).  $^{\alpha}S_{PIE}$ ,  $^{\gamma}S_{PIE}$  and  $\beta_{S_{PIE}}$   
15 are not readily shown on the figure, but can be calculated from PIE by the effective numbers of  
16 species (see Jost 2006). Other metrics presented in Table 1 are not shown for clarity.

17

18 **Figure 5.** Results from a simple spatial simulation model in which diversity parameters were  
19 varied. The description on the left for each scenario in A-F indicates how one community, the  
20 ‘reference’ (open circles for accumulation; dashed lines for rarefaction)) was varied relative to  
21 the one in which biodiversity change was imposed (closed circles; solid lines for rarefaction).  
22 The left column show species accumulation curves (mean  $\pm 1$  standard deviation) and the right  
23 column shows rarefaction curves and 95% confidence intervals. The final row—in which

1 aggregation was manipulated—is illustrated with two scales for the individual-based rarefaction  
2 from the ‘change’ scenario. See text for detail.

3  
4 **Figure 6.** Bivariate relationships between  $N$ ,  $S_{PIE}$  and  $S$  for 346 communities across the 37  
5 datasets. (A)  $S_{PIE}$  as a function of  $N$ ; (B)  $S$  as a function of  $N$ ; (C)  $S$  as a function of  $S_{PIE}$ . Black  
6 lines depict the relationships across studies (and correspond to  $R^2$  fixed); colored points and lines  
7 show the relationships within studies. All axes are log-scale.

8  
9 **Figure 7.** Representative rarefaction curves, the proportion of curves that crossed, and counts of  
10 how often curves crossed. (A) Rarefaction curves for different local communities within two  
11 datasets: marine invertebrates (nematodes) along a gradient from a waste plant outlet  
12 (Lamshead 1986), and trees in a Ugandan rainforest (Eggeling 1947); axes are log-transformed.  
13 (B) Counts of how many times pairs of rarefaction curves (from the same community) crossed;  
14 y-axis is on a log-scale.

15  
16 **Figure 8.** Effect of nutrient additions on several measurements of biodiversity from Table 1.  
17 Each biodiversity measure was calculated at the  $\alpha$ -scale (1 mesocosm) (Panels A,B),  $\gamma$ -scale (15  
18 mesocosms) (Panels C,D), as well as the  $\beta$ -scale (i.e. turnover across scales,  $\gamma/\alpha$ )(Panels E,F).  
19 See Chase (2010) for details on the experimental design and the mobr package (McGlenn et al.  
20 submitted, <https://github.com/MoBiodiv/mobr>) for details on the statistical methods

21  
22

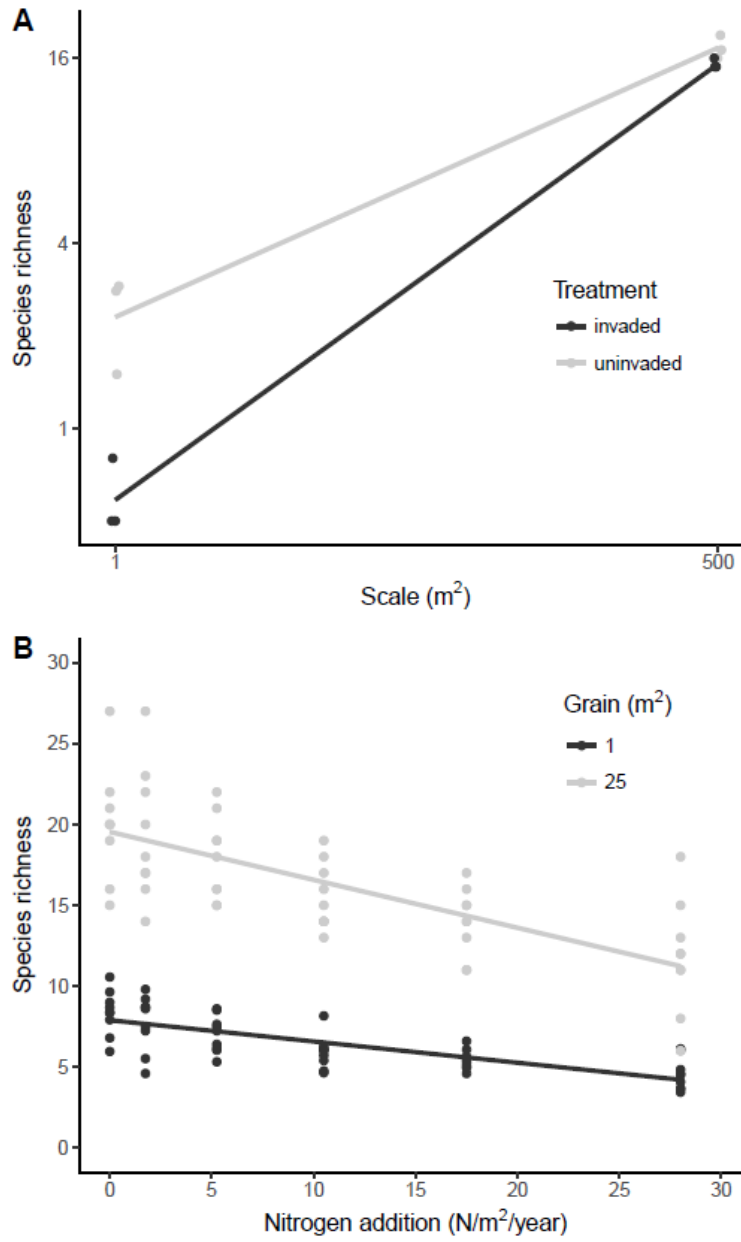

1

2

3 **Figure 1.**

4

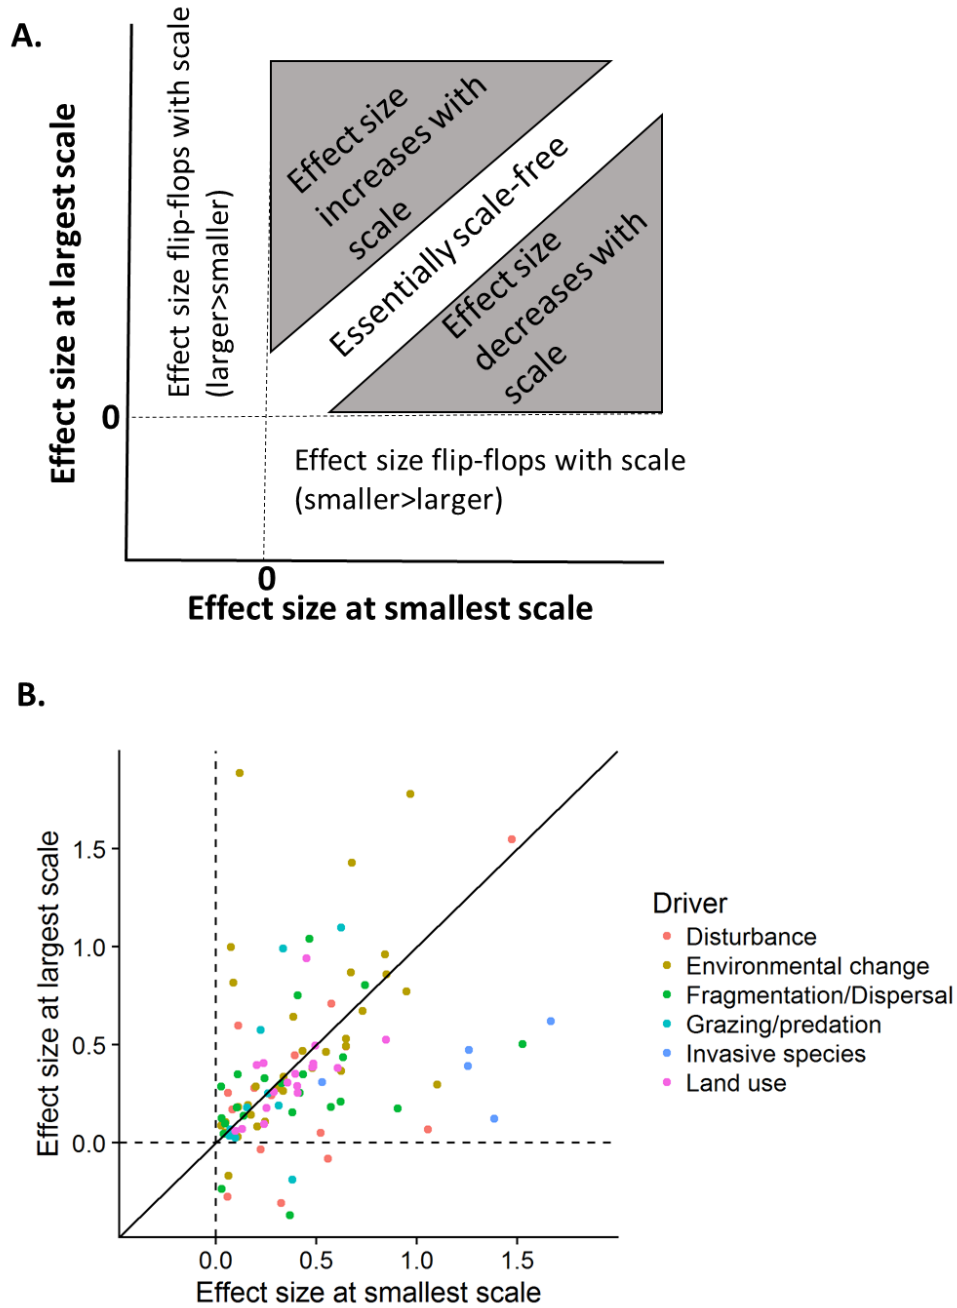

1

2 **Figure 2.**



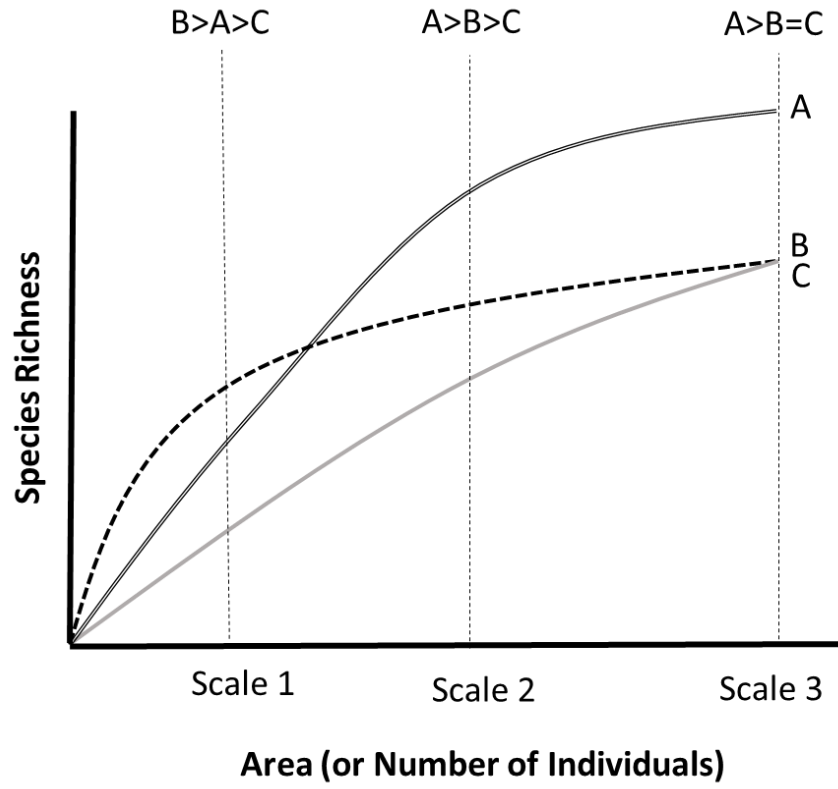

1

2 **Figure 3.**

3

4

5

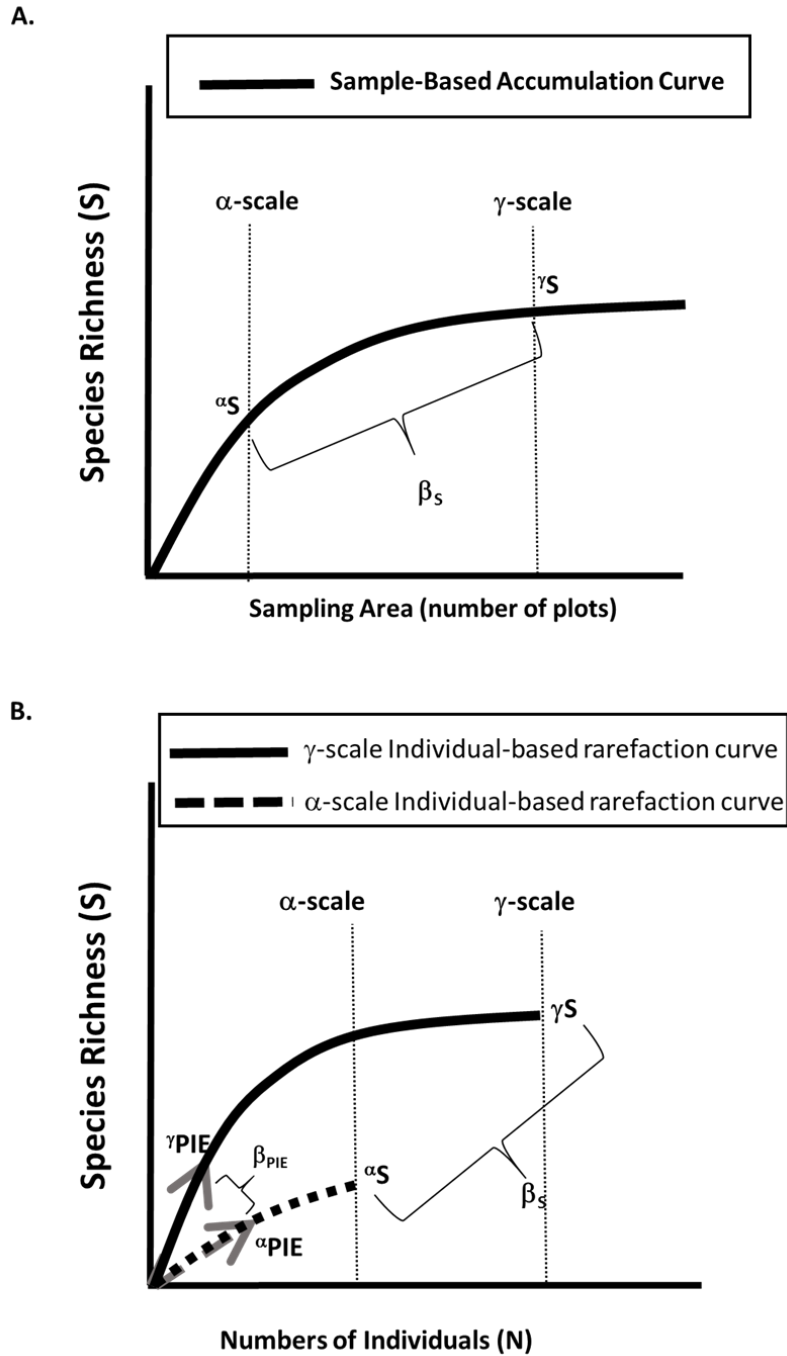

1

2 **Figure 4.**

3

4

5

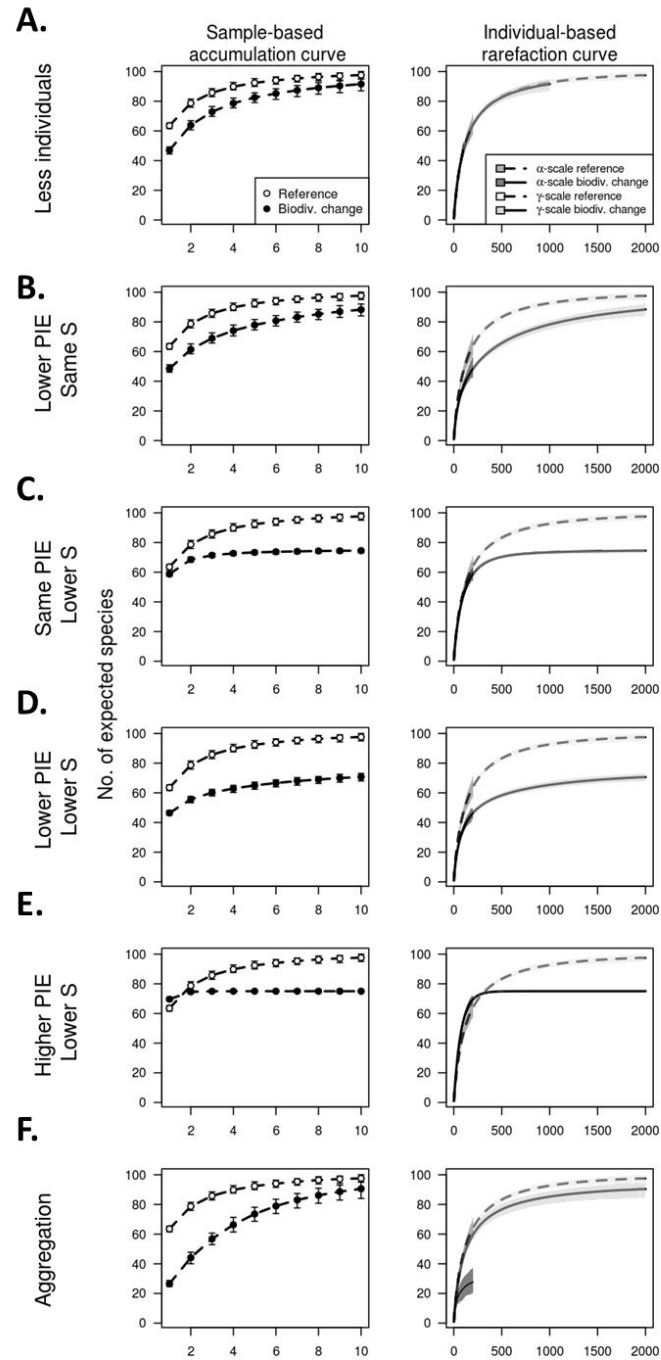

1

2

3 **Figure 5.**

4

5

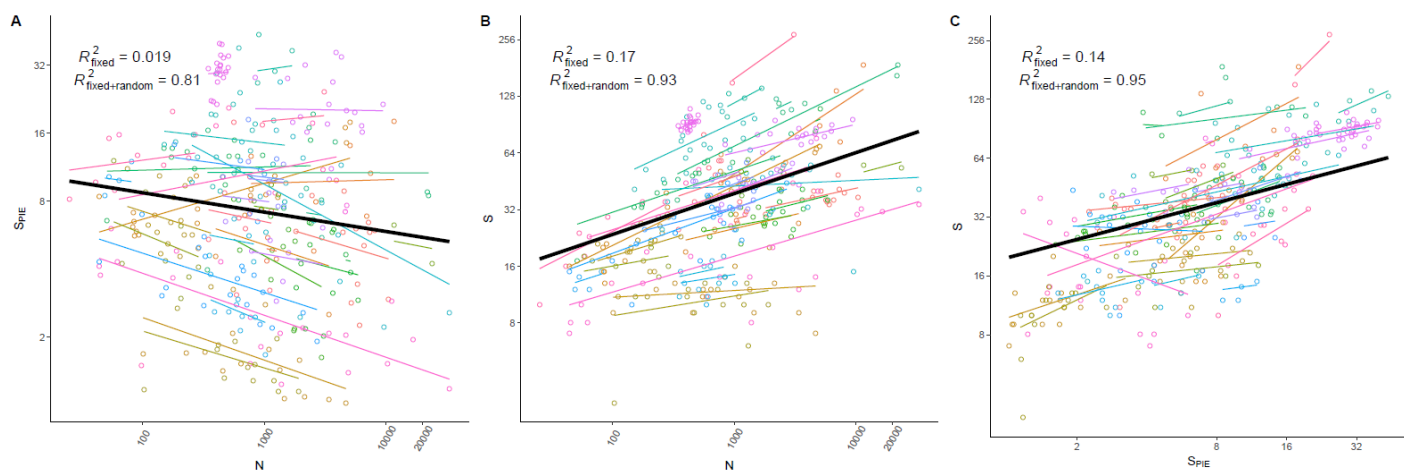

1

2

3 **Figure 6.**

4

1

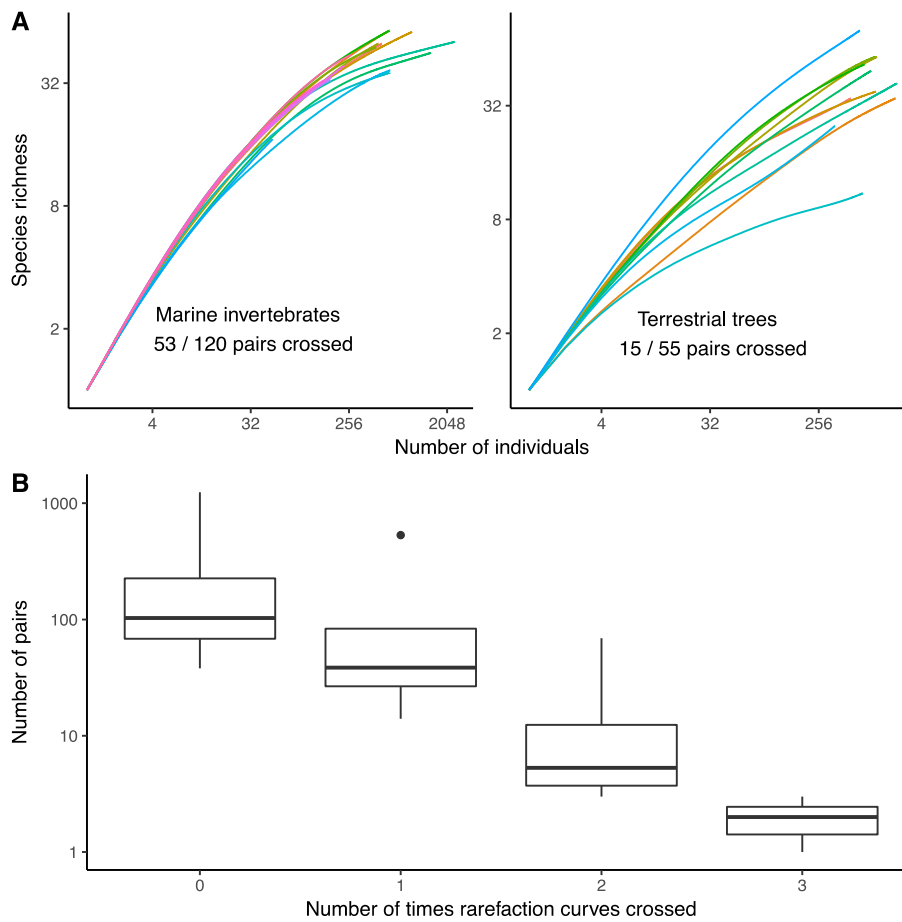

2

3

4 **Figure 7.**

5

1

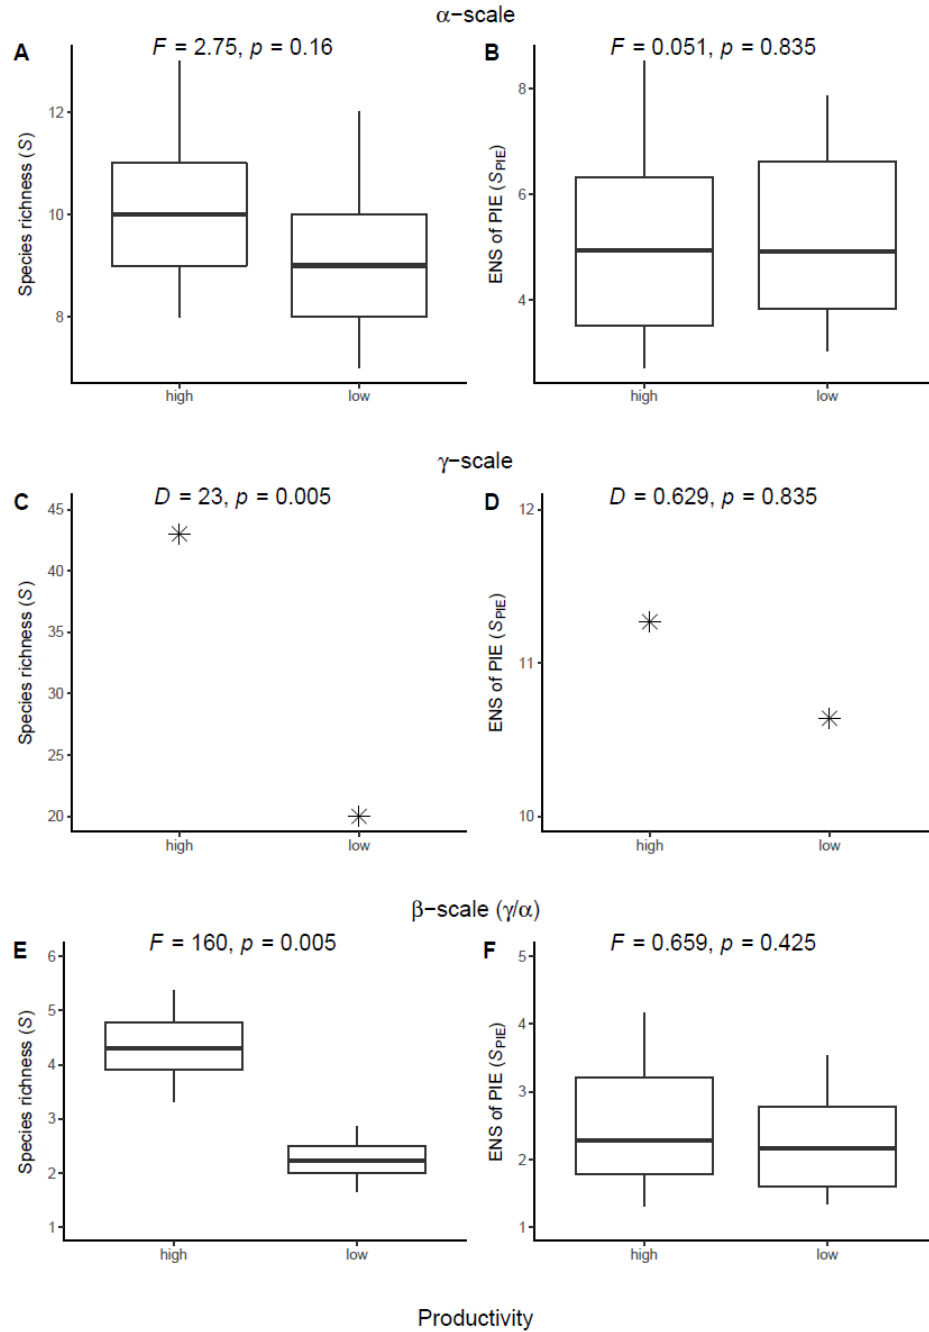

2

3 **Figure 8.**

4

5

6

## 1 Supplementary Information

2

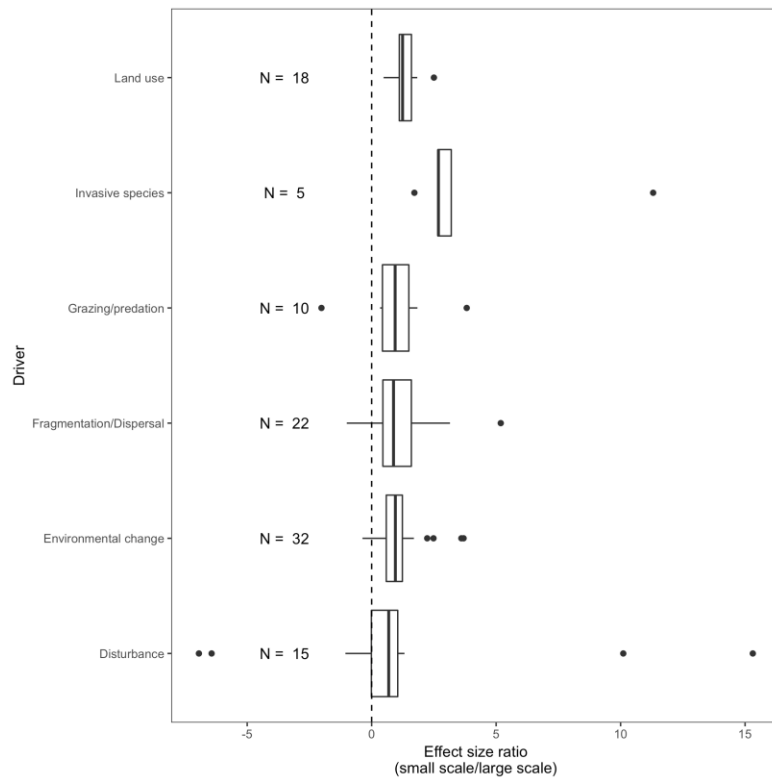

3

4

5 **Figure S1.** Results showing the ratio of log-response ratio effect sizes from experiments where

6 species richness responses were measured at two spatial scales (small scale/large scale). The

7 dashed line at 0 would indicate studies where the effect sizes were the same at the smaller and

8 larger scale. For each category of ecological driver, the means are above 1, indicating that the

9 measured effect size is larger at the smaller relative to larger size, and this difference is

10 statistically significant for land use, invasive species, and grazing/predation.

11

1 Appendix 1. Effect sizes, metadata, and references for studies used in the scale-dependent meta-  
2 analysis presented in Figure 2.

3 File available here:

4 [https://www.dropbox.com/sh/s3vmrwy1b7khz2/AAAnWDucBJYdxPdT\\_tOk2olOa?dl=0](https://www.dropbox.com/sh/s3vmrwy1b7khz2/AAAnWDucBJYdxPdT_tOk2olOa?dl=0)

5 (will be deposited in appropriate repository on acceptance)

6

7

8 Appendix 2. Raw data and references for rarefaction curves and analyses presented in Figures 6  
9 and 7. Subset of studies presented in McGill 2011b.

10 File available here:

11 [https://www.dropbox.com/sh/s3vmrwy1b7khz2/AAAnWDucBJYdxPdT\\_tOk2olOa?dl=0](https://www.dropbox.com/sh/s3vmrwy1b7khz2/AAAnWDucBJYdxPdT_tOk2olOa?dl=0)

12 (will be deposited in appropriate repository on acceptance)

13

14

15 Appendix 3. Raw data for the analyses of invertebrate and amphibian communities in nutrient  
16 addition and reference treatments presented in Figure 8. From Chase (2010).

17 File available here:

18 [https://www.dropbox.com/sh/s3vmrwy1b7khz2/AAAnWDucBJYdxPdT\\_tOk2olOa?dl=0](https://www.dropbox.com/sh/s3vmrwy1b7khz2/AAAnWDucBJYdxPdT_tOk2olOa?dl=0)

19 (will be deposited in appropriate repository on acceptance)

20

21

22
